# Supplementary material for: Transcriptome and metabolome analyses provide crucial insights into the adaptation of chieh-qua to Fusarium oxysporum infection
Source: Front Plant Sci. 2024 Nov 7;15:1344155. doi: 10.3389/fpls.2024.1344155 (PMC11578706; doi:10.3389/fpls.2024.1344155)
Supplement: Supplementary Table 3 — Differential metabolites in GB_vs_CK. [file Table3.xlsx]

## Sheet: GB_vs_CK.metabolize
Index	Compounds	Class	CK1	CK2	CK3	GB1	GB2	GB3	VIP	Fold_Change	Log2FC	Type
pma0110	O-Sinapoyl quinic acid	Organic acids and derivatives	42500	35300	23000	77300	89100	96800	1.03	2.61	1.38	up
pma0134	D(-)-Threose	Carbohydrates	3120000	4690000	3560000	19000000	19300000	20400000	1.1	5.16	2.37	up
pma0249	Selgin 5-O-hexoside	Flavone	353000	620000	471000	9	9	9	1.11	1.87e-05	-15.7	down
pma0253	O-methylChrysoeriol 5-O-hexoside	Flavone	431000	474000	338000	89900	46200	64800	1.08	0.162	-2.63	down
pma0461	14,15-Dehydrocrepenynic acid	Lipids	14000000	35000000	21000000	4400000	4320000	4400000	1.05	0.187	-2.42	down
pma0724	Naringenin C-hexoside	Flavone	497000	1020000	707000	58300	62700	35400	1.09	0.0703	-3.83	down
pma0948	Hydroxyphenethylamine	Others	406000	294000	306000	88300	79100	77300	1.1	0.243	-2.04	down
pma1108	Apigenin C-glucoside	Flavone	6790000	12500000	9060000	1320000	1280000	1300000	1.09	0.138	-2.86	down
pma2088	Quercetin-3,4'-O-di-beta-glucopyranoside	Flavonol	528000	299000	359000	9	9	9	1.11	2.28e-05	-15.4	down
pma2681	Xanthurenic acid	Organic acids and derivatives	90300	110000	145000	64000	40200	38800	1	0.414	-1.27	down
pma2987	Histidinol	Alcohols	25700000	26300000	24300000	55900000	52500000	57400000	1.1	2.17	1.12	up
pma3101	Nicotinate ribonucleoside	Vitamins and derivatives	6280000	5000000	4010000	1320000	1040000	1450000	1.08	0.249	-2	down
pma3606	9-Hydroxy-(10E,12Z,15Z)-octadecatrienoic acid	Lipids	14500000	41000000	22300000	3500000	3590000	3620000	1.06	0.138	-2.86	down
pma3724	1-O-Feruloyl quinic acid	Organic acids and derivatives	5420000	4160000	4430000	1460000	1450000	1430000	1.1	0.31	-1.69	down
pma6199	Chrysin O-hexoside	Flavone	95100	131000	132000	47100	34100	52100	1.05	0.372	-1.43	down
pma6298	3-Hydroxypyridine	Others	1450000	1400000	1300000	378000	392000	438000	1.1	0.291	-1.78	down
pma6360	O-methylChrysoeriol 8-C-hexoside	Flavone	103000	60200	88100	9	9	9	1.11	0.000107	-13.2	down
pma6455	Ribulose-5-phosphate	Carbohydrates	65100	55400	53600	25700	30700	20600	1.06	0.442	-1.18	down
pma6460	5-O-p-Coumaroylquinic acid	Organic acids and derivatives	175000	175000	174000	33500	31100	31400	1.11	0.183	-2.45	down
pma6499	Limocitrin O-hexoside	Flavone	347000	280000	418000	9	9	9	1.11	2.58e-05	-15.2	down
pma6516	C-hexosyl-apigenin O-hexosyl-O-hexoside	Flavone	23900000	23400000	34300000	3950000	3970000	3380000	1.1	0.138	-2.85	down
pma6561	Caffeic acid O-glucoside	Phenylpropanoids	27800000	30600000	23400000	8550000	8200000	7990000	1.1	0.302	-1.73	down
pma6586	Tricin O-glycerylhexoside	Flavone	9	9	9	298000	305000	231000	1.11	30900	14.9	up
pma6599	6-Hydroxymethylherniarin	Phenylpropanoids	1970000	3280000	3200000	1280000	1290000	1200000	1.02	0.446	-1.16	down
pma6625	E-3,4,5'-Trihydroxy-3'-glucopyranosylstilbene	Others	65500	77400	72300	9	9	9	1.11	0.000125	-13	down
pma6639	Isorhamnetin O-hexoside	Flavonol	531000	742000	618000	9	9	9	1.11	1.43e-05	-16.1	down
pmb0034	Glu-Glu	Amino acid and derivatives	1190000	1220000	979000	419000	439000	449000	1.1	0.386	-1.37	down
pmb0069	Benzamide	Others	106000	209000	122000	39500	40200	49200	1.04	0.295	-1.76	down
pmb0115	3-Hydroxykynurenine	Amino acid and derivatives	1340000	1990000	1580000	418000	455000	461000	1.09	0.272	-1.88	down
pmb0128	delta-Tridecalactone	Lipids	120000	141000	198000	9	9	9	1.11	5.88e-05	-14.1	down
pmb0130	N-Acetyl tryptamine	Phenolamides	103000	128000	81400	9	9	9	1.11	8.64e-05	-13.5	down
pmb0142	Caffeic aldehyde	Phenylpropanoids	2850000	3320000	3050000	308000	315000	348000	1.11	0.105	-3.25	down
pmb0149	MAG (18:4) isomer1	Lipids	979000	1220000	1740000	507000	469000	500000	1.04	0.375	-1.42	down
pmb0160	MAG (18:3) isomer5	Lipids	10100000	8020000	9060000	4340000	4490000	4450000	1.09	0.489	-1.03	down
pmb0165	LysoPC 16:1	Lipids	5100000	3700000	3770000	99900	124000	109000	1.11	0.0265	-5.24	down
pmb0168	PC 16:1/14:1	Lipids	353000	540000	494000	38900	37700	39000	1.1	0.0833	-3.58	down
pmb0235	O-Feruloyl coumarin	Phenylpropanoids	858000	1450000	1100000	279000	244000	363000	1.07	0.26	-1.94	down
pmb0247	p-Aminobenzoate	Organic acids and derivatives	360000	504000	362000	132000	142000	144000	1.08	0.341	-1.55	down
pmb0287	MAG (18:4) isomer2	Lipids	109000	81900	88500	42700	49000	45100	1.07	0.49	-1.03	down
pmb0296	MAG (18:1) isomer2	Lipids	2340000	1520000	2030000	459000	506000	468000	1.09	0.243	-2.04	down
pmb0302	2-Aminoethylphosphonate	Lipids	655000	559000	583000	80600	135000	101000	1.09	0.176	-2.5	down
pmb0325	N-Feruloyl spermidine	Phenolamides	94900	116000	57100	9	9	9	1.11	0.000101	-13.3	down
pmb0374	Aminopurine	Others	11900000	24900000	10300000	249000	251000	329000	1.1	0.0176	-5.83	down
pmb0426	5-Methoxy-N,N-dimethyltryptamine	Alkaloids	1700000	1390000	1220000	631000	691000	656000	1.07	0.459	-1.12	down
pmb0478	Coumarin O-rutinoside	Phenylpropanoids	18000	35200	30100	9	9	9	1.11	0.000324	-11.6	down
pmb0484	Choline	Alkaloids	7080000	6870000	5890000	1610000	1500000	1550000	1.11	0.235	-2.09	down
pmb0492	"N',N"",N""'-p-coumaroyl-cinnamoyl-caffeoyl spermidine"	Phenolamides	3840000	3240000	3840000	1070000	947000	1170000	1.1	0.292	-1.78	down
pmb0505	N'-p-Coumaroyl putrescine	Phenolamides	159000	269000	120000	9	9	9	1.11	4.93e-05	-14.3	down
pmb0514	Adenosine 3'-monophosphate	Nucleotide and derivates	36500000	68600000	30000000	3180000	3040000	2980000	1.09	0.0681	-3.88	down
pmb0530	Nicotinic acid adenine dinucleotide	Nucleotide and derivates	6360000	6910000	6480000	909000	841000	1020000	1.11	0.14	-2.83	down
pmb0532	Inosine 5'-monophosphate	Nucleotide and derivates	3610000	5590000	2540000	211000	201000	303000	1.09	0.0609	-4.04	down
pmb0545	Rosinidin O-hexoside	Anthocyanins	63200	133000	198000	1930000	2310000	2220000	1.08	16.4	4.03	up
pmb0565	Syringetin 3-O-hexoside	Flavonol	396000	331000	370000	9	9	9	1.11	2.46e-05	-15.3	down
pmb0595	Isorhamnetin 5-O-hexoside	Flavonol	523000	687000	832000	9	9	9	1.11	1.32e-05	-16.2	down
pmb0602	Syringetin 7-O-hexoside	Flavone	429000	517000	373000	9	9	9	1.11	2.05e-05	-15.6	down
pmb0605	Apigenin 7-O-glucoside (Cosmosiin)	Flavone	548000	971000	744000	195000	196000	196000	1.07	0.259	-1.95	down
pmb0607	Chrysoeriol 7-O-hexoside	Flavone	192000	324000	250000	9	9	9	1.11	3.52e-05	-14.8	down
pmb0613	Apigenin 6-C-hexosyl-8-C-hexosyl-O-hexoside	Flavone	387000	801000	398000	140000	108000	122000	1.04	0.233	-2.1	down
pmb0624	6-C-hexosyl-luteolin O-hexoside	Flavone	140000	255000	150000	9	9	9	1.11	4.95e-05	-14.3	down
pmb0629	Chrysoeriol 6-C-hexoside	Flavone	328000	449000	478000	9	9	9	1.11	2.15e-05	-15.5	down
pmb0652	C-hexosyl-apigenin O-pentoside	Flavone	10600000	17000000	14200000	3230000	2880000	2970000	1.09	0.217	-2.2	down
pmb0681	Apigenin 8-C-pentoside	Flavone	50800	59400	58300	9	9	9	1.11	0.00016	-12.6	down
pmb0703	6-C-hexosyl-chrysoeriol O-feruloylhexoside	Flavone	714000	769000	797000	182000	158000	177000	1.11	0.227	-2.14	down
pmb0711	Quercetin 7-O-rutinoside	Flavonol	163000	65800	85900	349000	334000	336000	1.02	3.24	1.7	up
pmb0732	Tricin 5-O-feruloylhexoside	Flavone	130000	95300	90600	9	9	9	1.11	8.55e-05	-13.5	down
pmb0764	4-Methyl-5-thiazoleethanol	Alcohols	466000	256000	228000	31200	19800	34300	1.08	0.0898	-3.48	down
pmb0767	D-erythro-Dihydrosphingosine	Alcohols	881000	675000	925000	169000	98400	104000	1.09	0.15	-2.74	down
pmb0770	N-Feruloyl serotonin	Alkaloids	205000	131000	186000	9	9	9	1.11	5.17e-05	-14.2	down
pmb0800	Niacinamide	Vitamins and derivatives	40300000	29000000	27200000	8670000	7990000	7340000	1.09	0.249	-2.01	down
pmb0801	4-Pyridoxic acid O-hexoside	Vitamins and derivatives	177000	657000	673000	9	9	9	1.1	1.79e-05	-15.8	down
pmb0802	D-Pantothenic acid	Vitamins and derivatives	1050000	1140000	1120000	237000	258000	191000	1.1	0.207	-2.27	down
pmb0812	Imidazole-4-acetate	Indole derivatives	1240000	1070000	1330000	9	9	9	1.11	7.42e-06	-17	down
pmb0818	Methoxyindoleacetic acid	Indole derivatives	1490000	1200000	1910000	10800000	10800000	10700000	1.1	7.02	2.81	up
pmb0819	3-Indoleacetonitrile	Indole derivatives	107000	157000	521000	10300000	14200000	14000000	1.08	49	5.62	up
pmb0848	LysoPC 16:1 (2n isomer)	Lipids	54400000	37100000	58100000	4230000	4090000	3960000	1.1	0.0821	-3.61	down
pmb0852	LysoPC 18:2	Lipids	3160000	2270000	2430000	20400	19300	32200	1.11	0.00915	-6.77	down
pmb0854	LysoPC 18:3	Lipids	77000000	68100000	69200000	17500000	12700000	12600000	1.1	0.2	-2.32	down
pmb0855	LysoPC 16:0	Lipids	4900000	5290000	5620000	1100000	813000	706000	1.1	0.166	-2.59	down
pmb0856	LysoPE 18:1 (2n isomer)	Lipids	33500000	31800000	39400000	7060000	6890000	6840000	1.11	0.199	-2.33	down
pmb0859	LysoPC 18:1 (2n isomer)	Lipids	3820000	2630000	4910000	144000	124000	134000	1.1	0.0354	-4.82	down
pmb0863	LysoPC 16:2 (2n isomer)	Lipids	25900000	15300000	26100000	1140000	1120000	1100000	1.1	0.0499	-4.32	down
pmb0864	LysoPE 14:0	Lipids	539000	579000	693000	107000	100000	107000	1.1	0.173	-2.53	down
pmb0865	LysoPC 18:3 (2n isomer)	Lipids	8930000	6300000	9030000	814000	755000	730000	1.1	0.0948	-3.4	down
pmb0866	LysoPC 14:0	Lipids	1610000	1410000	1480000	255000	233000	212000	1.11	0.156	-2.68	down
pmb0873	LysoPC 18:2 (2n isomer)	Lipids	1660000	1290000	1660000	74000	70000	57100	1.11	0.0436	-4.52	down
pmb0874	LysoPE 18:2 (2n isomer)	Lipids	12500000	8650000	9510000	215000	210000	225000	1.11	0.0212	-5.56	down
pmb0876	LysoPE 16:0	Lipids	1650000	1310000	1490000	198000	119000	103000	1.09	0.0944	-3.41	down
pmb0877	LysoPE 18:1	Lipids	1240000	1120000	1550000	290000	253000	299000	1.1	0.215	-2.22	down
pmb0880	LysoPE 18:0 (2n isomer)	Lipids	52000	34800	41200	9	9	9	1.11	0.000211	-12.2	down
pmb0882	LysoPC 18:1	Lipids	29400000	19800000	20700000	251000	174000	199000	1.11	0.00893	-6.81	down
pmb0883	LysoPE 18:0	Lipids	863000	780000	960000	97200	44100	47600	1.09	0.0726	-3.78	down
pmb0885	4-oxo-9Z,11Z,13E,15E-octadecatetraenoic acid	Lipids	1380000	2000000	2340000	377000	374000	399000	1.09	0.201	-2.31	down
pmb0889	Punicic acid	Lipids	34500000	96500000	49300000	5600000	5480000	5430000	1.07	0.0916	-3.45	down
pmb1096	Indole	Indole derivatives	4720000	4060000	6030000	37400000	34600000	34600000	1.1	7.2	2.85	up
pmb1318	8-Methyl-2-oxo-4-phenyl-2H-chromen-7-yl 4-(hexyloxy)benzoate	Organic acids and derivatives	13100000	12100000	13700000	5890000	5720000	5760000	1.1	0.447	-1.16	down
pmb1530	Phytocassane D	Terpene	539000	1060000	903000	145000	159000	159000	1.07	0.185	-2.43	down
pmb1562	MAG (18:4) isomer3	Lipids	282000	331000	280000	594000	813000	724000	1.08	2.39	1.25	up
pmb1574	Octadecadien-6-ynoic acid	Lipids	7640000	9200000	8950000	582000	566000	537000	1.11	0.0653	-3.94	down
pmb1587	4-Hydroxy-3,5-diisopropylbenzaldehyde	Organic acids and derivatives	194000	237000	244000	9	9	9	1.11	4e-05	-14.6	down
pmb1626	MGMG (18:2) isomer1	Lipids	13800000	9730000	11000000	3690000	1870000	1600000	1.05	0.207	-2.27	down
pmb1650	Octadeca-11E,13E,15Z-trienoic acid	Lipids	48500000	54200000	42100000	15900000	19100000	18800000	1.09	0.372	-1.43	down
pmb1652	Phthalic anhydride	Others	9280000	10100000	7970000	3630000	3460000	3750000	1.1	0.396	-1.34	down
pmb1656	MAG (18:3) isomer4	Lipids	2560000	1570000	2020000	4450000	4640000	4410000	1.04	2.2	1.13	up
pmb1754	O-Phosphocholine	Alkaloids	8160000	11100000	7140000	2900000	3340000	3110000	1.07	0.354	-1.5	down
pmb1912	10-Formyl-THF	Organic acids and derivatives	29400000	35300000	31400000	9250000	8280000	8820000	1.1	0.274	-1.87	down
pmb2211	Cocamidopropyl betaine	Alkaloids	5600000	6460000	5550000	1610000	1430000	1490000	1.1	0.257	-1.96	down
pmb2260	LysoPC 15:1	Lipids	92700	79600	79800	9	9	9	1.11	0.000107	-13.2	down
pmb2319	LysoPC 15:0	Lipids	2590000	2440000	2840000	1100000	1040000	1040000	1.1	0.404	-1.31	down
pmb2363	MAG (18:1) isomer1	Lipids	1550000	1550000	1640000	610000	617000	592000	1.11	0.384	-1.38	down
pmb2383	MGMG (18:2) isomer2	Lipids	10900000	8150000	12300000	4960000	5340000	5300000	1.04	0.498	-1.01	down
pmb2388	LysoPC 18:0 (2n isomer)	Lipids	11400000	7880000	13100000	384000	357000	352000	1.1	0.0338	-4.89	down
pmb2406	LysoPC 17:0	Lipids	2120000	1990000	2420000	715000	442000	447000	1.08	0.246	-2.03	down
pmb2444	MAG (18:3) isomer1	Lipids	2760000	1030000	1440000	267000	296000	319000	1.05	0.169	-2.57	down
pmb2467	汐-Linolenic acid	Lipids	1230000	1000000	1070000	173000	169000	162000	1.11	0.153	-2.71	down
pmb2507	2-Deoxyribose 1-phosphate	Others	3420000	3570000	3030000	362000	254000	316000	1.1	0.093	-3.43	down
pmb2620	3,4-Dimethoxycinnamic acid	Phenylpropanoids	146000	61600	109000	9	9	9	1.11	8.53e-05	-13.5	down
pmb2640	Lauric acid (C12:0)	Lipids	12000	14500	9350	5180	5250	5170	1.06	0.435	-1.2	down
pmb2653	D(+)-Melezitose O-rhamnoside	Carbohydrates	207000	61800	76900	6770	9640	14600	1.04	0.0897	-3.48	down
pmb2654	Anthranilate O-hexosyl-O-hexoside	Organic acids and derivatives	172000	193000	122000	7800	9150	4600	1.1	0.0443	-4.5	down
pmb2657	Argininosuccinate	Organic acids and derivatives	567000	481000	540000	86400	84100	83800	1.11	0.16	-2.64	down
pmb2684	Cyclic AMP	Nucleotide and derivates	1890000	1840000	1340000	255000	211000	249000	1.1	0.141	-2.83	down
pmb2778	9,10-EODE	Lipids	6890000	19200000	10200000	1190000	1180000	1180000	1.07	0.0978	-3.35	down
pmb2786	9-HOTrE	Lipids	6300000	10500000	7970000	974000	949000	965000	1.1	0.117	-3.1	down
pmb2787	9-KODE	Lipids	1170000	1190000	1160000	120000	116000	110000	1.11	0.0983	-3.35	down
pmb2789	13-HpOTrE(r)	Lipids	2850000	6350000	4020000	511000	545000	507000	1.08	0.118	-3.08	down
pmb2791	9-HpOTrE	Lipids	2840000	6230000	3980000	483000	479000	464000	1.08	0.109	-3.19	down
pmb2795	4-Methoxycinnamic acid	Phenylpropanoids	1820000	1090000	1050000	215000	211000	220000	1.09	0.163	-2.62	down
pmb2799	12,13-EODE	Lipids	167000	224000	189000	25200	25600	27600	1.1	0.135	-2.89	down
pmb2804	13-HPODE	Lipids	174000	499000	271000	39800	40000	37700	1.06	0.124	-3.01	down
pmb2826	Citramalate	Organic acids and derivatives	759000	927000	826000	9	9	9	1.11	1.07e-05	-16.5	down
pmb2850	Tricin	Flavone	9	9	9	28200	25700	24600	1.11	2910	11.5	up
pmb2867	Kynurenic acid O-hexside	Organic acids and derivatives	361000	481000	370000	52200	46400	46800	1.1	0.12	-3.06	down
pmb2893	N-p-Coumaroyl hydroxyagmatine	Phenolamides	25800	20600	25500	9	9	9	1.11	0.000376	-11.4	down
pmb2928	Gallic acid O-Hexoside	Organic acids and derivatives	14600000	10700000	11500000	2290000	1990000	2140000	1.1	0.174	-2.52	down
pmb2933	Caftaric acid	Phenylpropanoids	9470	29200	21200	9	9	9	1.1	0.000451	-11.1	down
pmb2979	Hesperetin O-malonylhexoside	Flavanone	994000	1240000	1160000	208000	171000	140000	1.1	0.153	-2.71	down
pmb2984	Acetyl-eriodictyol O-hexoside	Flavone	38200	31100	20000	9	9	9	1.11	0.000302	-11.7	down
pmb3000	Chrysoeriol O-acetylhexoside	Flavone	24000	16900	18700	91500	75100	91700	1.09	4.33	2.12	up
pmb3023	Eriodictyol C-hexoside	Flavone	11000000	17800000	14900000	440000	458000	502000	1.1	0.032	-4.96	down
pmb3046	Tricin 7-O-hexoside	Flavone	9	9	9	337000	355000	367000	1.11	39200	15.3	up
pmb3056	Homovanilloyl quinic acid	Organic acids and derivatives	178000	306000	169000	9	9	9	1.11	4.13e-05	-14.6	down
pmb3058	Quinic acid O-glucuronic acid	Organic acids and derivatives	99400	135000	60800	9	9	9	1.11	9.15e-05	-13.4	down
pmb3068	1-O-p-Coumaroyl quinic acid	Organic acids and derivatives	9170	31200	15500	9	9	9	1.1	0.000483	-11	down
pmb3074	3-O-p-Coumaroyl quinic acid	Organic acids and derivatives	23500000	19500000	22800000	5490000	5320000	5370000	1.11	0.246	-2.02	down
pmb3088	Trehalose 6-phosphate	Carbohydrates	31000	30500	22100	10100	8760	8940	1.08	0.333	-1.59	down
pmb3099	Diethyl phosphate	Organic acids and derivatives	641000	667000	450000	9	9	9	1.11	1.54e-05	-16	down
pmb3101	2-Isopropylmalate	Organic acids and derivatives	7290000	3990000	5710000	272000	244000	237000	1.1	0.0443	-4.5	down
pmb3110	Vanillic acid	Phenylpropanoids	92300	117000	109000	18200	20200	24800	1.1	0.199	-2.33	down
pmb3317	Quinacyl syringic acid	Organic acids and derivatives	72000	113000	59400	9	9	9	1.11	0.00011	-13.1	down
pmb3894	Di-O-methylquercetin	Flavonol	1390000	1900000	1800000	267000	253000	277000	1.1	0.157	-2.68	down
pmc0066	2'-Deoxyinosine-5'-monophosphate	Nucleotide and derivates	20600000	18600000	19800000	6600000	7690000	7220000	1.1	0.365	-1.46	down
pmc0281	Adenosine O-ribose	Nucleotide and derivates	4680000	5410000	6260000	18300000	16200000	16600000	1.1	3.13	1.64	up
pmc0304	Succinyladenosine	Nucleotide and derivates	15000000	17100000	16300000	2830000	2710000	2820000	1.11	0.173	-2.53	down
pmc0682	4-Aminoindole	Indole derivatives	1380000	1780000	1610000	364000	351000	323000	1.1	0.218	-2.2	down
pmc0960	LysoPC 20:4	Lipids	80500000	56000000	86000000	3580000	3250000	3190000	1.1	0.045	-4.47	down
pmc1990	4'-Hydroxy-5,7-dimethoxyflavanone	Flavanone	47400	49400	38300	489000	533000	522000	1.11	11.4	3.51	up
pmd0017	Spermine	Phenolamides	5990000	6200000	6180000	14100000	14100000	14400000	1.11	2.32	1.21	up
pmd0023	Adenosine	Nucleotide and derivates	644000	1180000	531000	135000	125000	129000	1.07	0.165	-2.6	down
pmd0130	LysoPC 14:0 (2n isomer)	Lipids	2180000	2450000	2690000	410000	385000	368000	1.11	0.159	-2.65	down
pmd0132	LysoPC 16:0 (2n isomer)	Lipids	5990000	5280000	5580000	1140000	844000	831000	1.1	0.167	-2.58	down
pmd0136	LysoPC 18:0	Lipids	54900000	50700000	51300000	8390000	4990000	4900000	1.1	0.117	-3.1	down
pmd0144	LysoPC 20:1 (2n isomer)	Lipids	587000	504000	666000	41500	22300	39200	1.1	0.0586	-4.09	down
pmd0145	LysoPC 20:1	Lipids	717000	509000	727000	38200	38600	36100	1.11	0.0578	-4.11	down
pmd0158	LysoPE 14:0 (2n isomer)	Lipids	13100	14800	12900	2760	3490	1850	1.08	0.199	-2.33	down
pmd0160	LysoPE 16:0 (2n isomer)	Lipids	29500000	25600000	29000000	4830000	3080000	3070000	1.1	0.131	-2.94	down
pme0004	L-Homocitrulline	Amino acid and derivatives	1540000	1790000	1760000	362000	342000	338000	1.11	0.205	-2.29	down
pme0006	L-Proline	Amino acid and derivatives	4070000	3950000	4620000	2090000	1990000	2130000	1.1	0.491	-1.03	down
pme0008	L-Citrulline	Amino acid and derivatives	7120000	10100000	18700000	111000000	120000000	123000000	1.08	9.86	3.3	up
pme0011	L-Aspartic acid	Amino acid and derivatives	7040000	7780000	9660000	2300000	2230000	2220000	1.1	0.276	-1.86	down
pme0014	L-Glutamic acid	Amino acid and derivatives	60000000	67800000	54600000	22700000	24600000	24100000	1.1	0.391	-1.35	down
pme0037	L-Histidine	Amino acid and derivatives	12200000	8280000	8550000	638000	666000	660000	1.1	0.0677	-3.89	down
pme0038	Cytosine	Nucleotide and derivates	1420000	2440000	1170000	328000	352000	376000	1.06	0.21	-2.25	down
pme0050	L-Tryptophan	Amino acid and derivatives	7800000	5980000	9860000	64100000	63800000	64400000	1.1	8.13	3.02	up
pme0056	2,3-dimethylsuccinic acid	Amino acid and derivatives	5080000	7110000	6970000	928000	906000	892000	1.1	0.142	-2.81	down
pme0085	Rosmarinic acid	Organic acids and derivatives	174000	265000	308000	99400	75200	77400	1.04	0.337	-1.57	down
pme0109	(-)-3-(3,4-Dihydroxyphenyl)-2-methylalanine	Amino acid and derivatives	229000	217000	284000	542000	465000	489000	1.07	2.05	1.04	up
pme0113	污-Glu-Cys	Amino acid and derivatives	837000	588000	414000	30500	23200	44100	1.09	0.0532	-4.23	down
pme0118	Pyrrole-2-carboxylic acid	Amino acid and derivatives	153000	152000	111000	9	9	9	1.11	6.49e-05	-13.9	down
pme0120	5-Aminovaleric acid	Amino acid and derivatives	480000	529000	336000	56300	38700	39100	1.1	0.0997	-3.33	down
pme0122	N6-Acetyl-L-lysine	Amino acid and derivatives	11000000	14800000	15500000	3110000	3280000	3340000	1.1	0.236	-2.09	down
pme0133	Asp-phe	Amino acid and derivatives	482000	583000	501000	215000	161000	191000	1.09	0.362	-1.47	down
pme0138	N汐-Acetyl-L-glutamine	Amino acid and derivatives	15300000	19800000	19300000	4670000	5110000	4960000	1.1	0.271	-1.88	down
pme0161	L-Homoserine	Amino acid and derivatives	27200	17400	21500	4850	6620	6550	1.07	0.273	-1.88	down
pme0163	汕-Nicotinamide mononucleotide	Nucleotide and derivates	2370000	2410000	2000000	620000	481000	701000	1.09	0.266	-1.91	down
pme0170	N汐-Acetyl-L-arginine	Amino acid and derivatives	1810000	1050000	1030000	224000	214000	215000	1.09	0.168	-2.57	down
pme0183	2-Hydroxy-6-aminopurine	Nucleotide and derivates	1160000	1690000	882000	168000	154000	234000	1.08	0.149	-2.75	down
pme0207	3-Hydroxybutyrate	Organic acids and derivatives	1490000	2270000	1720000	607000	533000	607000	1.08	0.319	-1.65	down
pme0234	Kynurenic acid	Organic acids and derivatives	23800000	22100000	17300000	2270000	2400000	2320000	1.1	0.111	-3.18	down
pme0237	Ethyl 3,4-Dihydroxybenzoate (Ethyl protocatechuate)	Organic acids and derivatives	237000	274000	179000	9	9	9	1.11	3.91e-05	-14.6	down
pme0238	2每furanoic acid	Organic acids and derivatives	2350000	3740000	2930000	649000	738000	565000	1.09	0.216	-2.21	down
pme0243	Glutaric acid	Organic acids and derivatives	3690000	4330000	3550000	1680000	1630000	1690000	1.1	0.432	-1.21	down
pme0245	Adipic acid	Organic acids and derivatives	6210000	8540000	8230000	1080000	1030000	1070000	1.1	0.138	-2.85	down
pme0247	trans-4-Hydroxy-L-proline	Amino acid and derivatives	33800	37000	28800	4510	6350	5310	1.1	0.162	-2.62	down
pme0253	N-Acetyl-l-leucine	Amino acid and derivatives	301000	184000	269000	40800	36000	40300	1.09	0.155	-2.69	down
pme0257	Uracil	Nucleotide and derivates	817000	1100000	676000	338000	365000	425000	1.03	0.435	-1.2	down
pme0267	2-Methylsuccinic acid	Organic acids and derivatives	2080000	2160000	2290000	399000	439000	485000	1.11	0.203	-2.3	down
pme0278	2,6-Diaminooimelic acid	Amino acid and derivatives	154000	179000	169000	398000	416000	362000	1.1	2.34	1.23	up
pme0281	Terephthalic acid	Organic acids and derivatives	2510000	3070000	2690000	9	9	9	1.11	3.26e-06	-18.2	down
pme0282	Phthalic acid	Organic acids and derivatives	219000	229000	200000	32200	36300	54500	1.09	0.19	-2.4	down
pme0285	4-Guanidinobutyric acid	Organic acids and derivatives	5180000	6520000	4720000	1570000	1510000	1560000	1.1	0.283	-1.82	down
pme0291	Dl-2-Aminooctanoic acid	Organic acids and derivatives	132000	86700	104000	9	9	9	1.11	8.37e-05	-13.5	down
pme0303	Caffeate	Phenylpropanoids	9250000	11200000	8980000	193000	188000	180000	1.11	0.0191	-5.71	down
pme0305	Ferulic acid	Phenylpropanoids	5610000	7210000	5800000	1280000	1270000	1280000	1.1	0.206	-2.28	down
pme0309	Methyl gallate	Organic acids and derivatives	26200	21900	12800	9	9	9	1.11	0.000443	-11.1	down
pme0333	Apigenin 7-O-neohesperidoside (Rhoifolin)	Flavone	9	9	9	81800	82400	92200	1.11	9500	13.2	up
pme0359	Apigenin 5-O-glucoside	Flavone	1180000	1940000	1430000	75700	83600	152000	1.09	0.0684	-3.87	down
pme0368	Apigenin 7-rutinoside (Isorhoifolin)	Flavone	9	9	9	70100	66400	111000	1.11	9170	13.2	up
pme0369	Kaempferol 3-O-rutinoside (Nicotiflorin)	Flavonol	9	9	9	95000	85300	60900	1.11	8930	13.1	up
pme0376	Naringenin	Flavanone	12700	28600	16400	9	9	9	1.11	0.000468	-11.1	down
pme0391	4-Methylumbelliferone	Phenylpropanoids	346000	243000	271000	9	9	9	1.11	3.14e-05	-15	down
pme0399	Chlorogenic acid (3-O-Caffeoylquinic acid)	Organic acids and derivatives	13000000	9890000	9870000	1150000	1000000	906000	1.1	0.0933	-3.42	down
pme0418	3-(4-Hydroxyphenyl)propionic acid	Phenylpropanoids	71500	59100	76700	28500	24900	16200	1.05	0.336	-1.57	down
pme0422	3-Hydroxy-4-methoxycinnamic acid	Phenylpropanoids	5580000	7230000	5900000	1260000	1220000	1290000	1.1	0.201	-2.31	down
pme0486	Methylmalonic acid	Organic acids and derivatives	26100000	21700000	20800000	1370000	1380000	1370000	1.11	0.0601	-4.06	down
pme0491	6-hydroxynicotinic acid	Vitamins and derivatives	159000	268000	298000	9	9	9	1.11	3.72e-05	-14.7	down
pme0500	D(+)-Melezitose	Carbohydrates	65600	47900	38600	10600	9460	8390	1.09	0.187	-2.42	down
pme0513	Xylitol	Alcohols	121000	171000	114000	9	9	9	1.11	6.65e-05	-13.9	down
pme0519	D-(+)-Sucrose	Carbohydrates	4690000	2960000	1530000	591000	622000	586000	1.02	0.196	-2.35	down
pme0534	Gluconic acid	Others	3430000	3500000	2960000	877000	840000	810000	1.11	0.256	-1.97	down
pme1018	Glutathione oxidized	Amino acid and derivatives	4640000	6950000	5490000	679000	611000	740000	1.1	0.119	-3.07	down
pme1021	D-(+)-Glucono-1,5-lactone	Carbohydrates	181000	179000	116000	23000	24500	39300	1.07	0.182	-2.46	down
pme1090	Glutathione reduced form	Amino acid and derivatives	6030000	4360000	2670000	274000	286000	299000	1.09	0.0658	-3.93	down
pme1107	Guanine	Nucleotide and derivates	92700	120000	94500	18600	18300	17700	1.1	0.178	-2.49	down
pme1175	Guanosine	Nucleotide and derivates	6200000	8960000	6670000	2650000	2500000	2740000	1.08	0.361	-1.47	down
pme1266	3-Methylxanthine	Nucleotide and derivates	79800	82500	76100	9	9	9	1.11	0.000113	-13.1	down
pme1281	Pyridoxal 5'-phosphate	Vitamins and derivatives	689000	464000	272000	9	9	9	1.11	1.89e-05	-15.7	down
pme1283	S-(5'-Adenosy)-L-homocysteine	Amino acid and derivatives	556000	585000	411000	70500	77500	68500	1.1	0.139	-2.84	down
pme1292	Homogentisic acid	Organic acids and derivatives	468000	315000	166000	1690000	1680000	1770000	1.05	5.42	2.44	up
pme1294	Xanthosine	Nucleotide and derivates	2640000	2530000	3130000	660000	607000	610000	1.1	0.226	-2.14	down
pme1313	N'-Formylkynurenine	Amino acid and derivatives	262000	254000	267000	670000	596000	684000	1.1	2.49	1.32	up
pme1373	2'-Deoxycytidine-5'-monophosphate	Nucleotide and derivates	42400	20400	37400	6590	6280	3460	1.05	0.163	-2.62	down
pme1378	1-Methyladenosine	Nucleotide and derivates	52200	59000	44000	17700	25200	23000	1.06	0.425	-1.24	down
pme1419	L-Methionine methyl ester	Amino acid and derivatives	1060000	822000	945000	73300	79100	79700	1.11	0.0821	-3.61	down
pme1434	Syringin	Phenylpropanoids	208000	187000	179000	9	9	9	1.11	4.7e-05	-14.4	down
pme1436	p-Coumaric acid	Phenylpropanoids	15000000	12800000	13200000	4930000	4820000	4680000	1.1	0.352	-1.51	down
pme1473	5'-Deoxy-5'-(methylthio)adenosine	Nucleotide and derivates	102000	130000	136000	9	9	9	1.11	7.34e-05	-13.7	down
pme1535	(+)-Gallocatechin (GC)	Polyphenol	40000	64900	53300	9	9	9	1.11	0.000171	-12.5	down
pme1598	Hesperetin 5-O-glucoside	Flavanone	157000	191000	218000	1630000	1770000	1650000	1.1	8.92	3.16	up
pme1611	Isohemiphloin	Flavone	797000	1410000	1020000	159000	169000	150000	1.09	0.148	-2.76	down
pme1624	Isovitexin	Flavone	6260000	11300000	7660000	1080000	1050000	1150000	1.09	0.13	-2.94	down
pme1665	Isovitexin 7-O-glucoside (Saponarin)	Flavonoid	1250000	2150000	1530000	339000	372000	462000	1.07	0.238	-2.07	down
pme1683	D-Pantothenic dcid	Organic acids and derivatives	5740000	5800000	6350000	309000	270000	304000	1.11	0.0494	-4.34	down
pme1695	Sinapic acid	Phenylpropanoids	125000	293000	170000	39500	48900	25900	1.03	0.194	-2.36	down
pme1709	Nicotinic Acid Methyl Ester (Methyl Nicotinate)	Vitamins and derivatives	5130000	3300000	5190000	677000	770000	775000	1.09	0.163	-2.62	down
pme1711	3-Hydroxy-3-methyl butyric acid	Organic acids and derivatives	293000	356000	363000	121000	121000	119000	1.1	0.357	-1.49	down
pme1712	L-Saccharopine	Amino acid and derivatives	561000	1010000	709000	316000	322000	287000	1.03	0.406	-1.3	down
pme1806	Chlorogenic acid methyl ester	Organic acids and derivatives	4650000	3930000	4390000	962000	910000	965000	1.11	0.219	-2.19	down
pme1814	2,5-dihydroxybenzoic acid (Gentisic acid)	Organic acids and derivatives	760000	677000	488000	9	9	9	1.11	1.4e-05	-16.1	down
pme1816	Neochlorogenic acid (5-O-Caffeoylquinic acid)	Organic acids and derivatives	1610000	5660000	2870000	451000	377000	355000	1.04	0.117	-3.1	down
pme1824	Protocatechuic acid	Polyphenol	1590000	1680000	1190000	238000	282000	232000	1.1	0.169	-2.57	down
pme1832	Succinic acid	Organic acids and derivatives	2070000	1920000	1700000	9	9	9	1.11	4.75e-06	-17.7	down
pme1846	D(+)-Glucose	Carbohydrates	1740000	1820000	872000	428000	342000	349000	1.04	0.252	-1.99	down
pme1977	Suberic acid	Organic acids and derivatives	407000	349000	359000	122000	132000	136000	1.1	0.35	-1.52	down
pme2019	DL-Arabinose	Carbohydrates	612000	749000	294000	108000	148000	156000	1.01	0.249	-2.01	down
pme2033	L(-)-Malic acid	Organic acids and derivatives	9760000	8760000	5360000	941000	882000	764000	1.09	0.108	-3.21	down
pme2036	Quinic acid	Organic acids and derivatives	21400000	30000000	13800000	6300000	5880000	4990000	1.04	0.263	-1.92	down
pme2050	Citric acid	Organic acids and derivatives	9840000	12800000	6020000	260000	177000	94700	1.09	0.0186	-5.75	down
pme2122	Histamine	Amino acid and derivatives	1400000	2050000	959000	306000	300000	336000	1.06	0.214	-2.23	down
pme2167	Orotic acid	Vitamins and derivatives	8540000	7300000	6250000	1190000	1240000	1430000	1.1	0.175	-2.52	down
pme2169	Fumaric acid	Organic acids and derivatives	21900000	17600000	17900000	3100000	2770000	2990000	1.11	0.154	-2.7	down
pme2237	Dulcitol	Alcohols	120000	204000	109000	9370	17700	16000	1.08	0.0995	-3.33	down
pme2241	Citraconic acid	Organic acids and derivatives	1940000	1650000	1540000	9	9	9	1.11	5.26e-06	-17.5	down
pme2253	L-Gulonic-污-lactone	Others	104000	129000	125000	237000	246000	248000	1.09	2.04	1.03	up
pme2256	D-Arabitol	Alcohols	190000	221000	126000	6080	9340	5890	1.1	0.0397	-4.66	down
pme2263	Biotin	Vitamins and derivatives	18100	10900	14800	9	9	9	1.11	0.000616	-10.7	down
pme2268	Trigonelline	Alkaloids	32000000	36000000	27000000	2770000	2630000	3160000	1.11	0.0901	-3.47	down
pme2278	Guanosine monophosphate	Nucleotide and derivates	219000	346000	175000	55500	60600	34500	1.05	0.204	-2.3	down
pme2292	Putrescine	Phenolamides	231000	135000	342000	1200000	1200000	1220000	1.06	5.11	2.35	up
pme2366	Phenethylamine	Others	574000	941000	602000	174000	218000	203000	1.07	0.281	-1.83	down
pme2380	A-Ketoglutaric acid	Organic acids and derivatives	1570000	1810000	1460000	236000	216000	208000	1.11	0.136	-2.87	down
pme2427	N-Acetyl-L-tyrosine	Amino acid and derivatives	472000	115000	265000	43700	39800	37000	1.01	0.141	-2.82	down
pme2435	L-Fucose	Carbohydrates	480000	381000	237000	9	9	9	1.11	2.46e-05	-15.3	down
pme2478	Protocatechuic aldehyde	Polyphenol	1310000	2280000	1290000	215000	198000	214000	1.09	0.128	-2.96	down
pme2529	1,5-Anhydro-D-glucitol	Alcohols	603000	474000	271000	9	9	9	1.11	2e-05	-15.6	down
pme2555	Adenosine 5'-monophosphate	Nucleotide and derivates	2330000	3620000	1950000	143000	120000	83700	1.1	0.0439	-4.51	down
pme2560	N-Acetylaspartate	Amino acid and derivatives	301000	504000	308000	140000	127000	73800	1.02	0.306	-1.71	down
pme2596	4-Pyridoxic acid	Alkaloids	2230000	3680000	2610000	673000	636000	499000	1.08	0.212	-2.24	down
pme2598	3,4-Dihydroxybenzeneacetic acid	Organic acids and derivatives	425000	640000	361000	9	9	9	1.11	1.89e-05	-15.7	down
pme2601	3-Hydroxypropanoic acid	Organic acids and derivatives	538000	515000	463000	131000	112000	124000	1.1	0.242	-2.05	down
pme2651	NADP	Nucleotide and derivates	574000	814000	1040000	280000	226000	212000	1.06	0.296	-1.76	down
pme2670	4-Hydroxybenzaldehyde	Organic acids and derivatives	7130000	25800000	29100000	2210000	2340000	2360000	1.01	0.111	-3.17	down
pme2693	N-Acetylputrescine	Phenolamides	421000	294000	282000	126000	131000	156000	1.05	0.414	-1.27	down
pme2706	2,3-Dihydroxybenzoic acid	Organic acids and derivatives	1650000	1730000	1170000	206000	199000	201000	1.1	0.133	-2.91	down
pme2723	Indole-3-carboxaldehyde	Indole derivatives	920000	1380000	1090000	422000	327000	395000	1.07	0.337	-1.57	down
pme2735	S-(5'-Adenosyl)-L-methionine	Amino acid and derivatives	28200000	19900000	22600000	3860000	3340000	2770000	1.1	0.141	-2.83	down
pme2746	Flavin adenine dinucleotide (FAD)	Nucleotide and derivates	5190000	4920000	4920000	303000	324000	316000	1.11	0.0627	-3.99	down
pme2755	N-Acetyl-D-glucosamine	Carbohydrates	227000	246000	261000	483000	500000	620000	1.08	2.18	1.13	up
pme2761	4-Hydroxy-2-oxoglutaric acid	Organic acids and derivatives	196000	269000	82000	9	9	9	1.11	4.94e-05	-14.3	down
pme2827	Palmitaldehyde	Lipids	2050000	2060000	1730000	24700000	26100000	25500000	1.11	13.1	3.71	up
pme2830	O-Phosphorylethanolamine	Others	34300	37200	27500	9490	11800	14700	1.06	0.364	-1.46	down
pme2901	1-O-Caffeoyl quinic acid	Organic acids and derivatives	1710000	5350000	2870000	459000	410000	367000	1.05	0.124	-3.01	down
pme2957	Naringenin chalcone	Flavanone	11200	33000	24600	9	9	9	1.1	0.000392	-11.3	down
pme2973	Icariin (kaempferol 3,7-O-diglucoside 8-prenyl derivative)	Flavonol	65900	80600	69200	9	9	9	1.11	0.000125	-13	down
pme2988	3,4-Dihydrocoumarin	Phenylpropanoids	493000	429000	349000	89400	78400	85600	1.1	0.199	-2.33	down
pme3007	Uridine 5＊-diphosphate	Nucleotide and derivates	106000	94000	115000	8500	18600	16200	1.08	0.137	-2.86	down
pme3011	污-aminobutyric acid	Organic acids and derivatives	8890000	8470000	8280000	1430000	1430000	1670000	1.11	0.177	-2.5	down
pme3017	2-Aminoisobutyric acid	Amino acid and derivatives	3970000	4310000	3770000	1200000	1250000	1320000	1.11	0.313	-1.68	down
pme3033	N,N-Dimethylglycine	Amino acid and derivatives	7060000	6320000	6360000	1370000	1380000	1550000	1.11	0.218	-2.2	down
pme3034	ethylmalonate	Organic acids and derivatives	111000	145000	110000	64600	55800	54400	1.07	0.478	-1.07	down
pme3083	2-(Formylamino)benzoic acid	Organic acids and derivatives	1890000	1680000	1600000	571000	536000	588000	1.1	0.328	-1.61	down
pme3096	Aminomalonic acid	Organic acids and derivatives	6060000	5510000	5120000	627000	684000	675000	1.11	0.119	-3.07	down
pme3104	1-Methyladenine	Nucleotide and derivates	563000	528000	401000	96900	128000	143000	1.08	0.247	-2.02	down
pme3123	Sinapyl alcohol	Phenylpropanoids	72600	66100	44000	9	9	9	1.11	0.000148	-12.7	down
pme3129	Quercetin 4'-O-glucoside (Spiraeoside)	Flavonol	130000	130000	173000	1360000	1450000	1240000	1.1	9.35	3.23	up
pme3134	3-Hydroxyflavone	Flavonol	11800	15100	15300	9	9	9	1.11	0.00064	-10.6	down
pme3143	6-Hydroxy-4-methylcoumarin	Phenylpropanoids	213000	113000	169000	9	9	9	1.11	5.45e-05	-14.2	down
pme3151	Deoxyribose 5-phosphate	Nucleotide and derivates	150000	119000	202000	67000	46200	56400	1.04	0.36	-1.47	down
pme3160	D-Glucose 6-phosphate	Carbohydrates	11800000	9860000	9710000	3690000	3520000	3350000	1.1	0.337	-1.57	down
pme3174	Cytidine 5'-monophosphate (Cytidylic acid)	Nucleotide and derivates	304000	711000	392000	89100	111000	165000	1	0.259	-1.95	down
pme3179	CYS-GLY	Amino acid and derivatives	494000	223000	144000	12200	16300	24200	1.06	0.0612	-4.03	down
pme3194	N-acetylglycine	Amino acid and derivatives	253000	640000	278000	1170000	1190000	1370000	1	3.19	1.67	up
pme3198	2,4-Dihydroxybenzoic acid	Organic acids and derivatives	757000	550000	549000	9	9	9	1.11	1.45e-05	-16.1	down
pme3210	Genistein 7-O-Glucoside (Genistin)	Isoflavone	1130000	1760000	1420000	156000	97200	77400	1.09	0.0767	-3.7	down
pme3227	Vitexin 2''-O-beta-L-rhamnoside	Flavone	3380000	5760000	3890000	1220000	1040000	1050000	1.08	0.254	-1.98	down
pme3246	Coniferin	Phenylpropanoids	26900000	26300000	23600000	8090000	7730000	7850000	1.11	0.308	-1.7	down
pme3303	Tricetin	Flavone	176000	179000	149000	68800	48900	67200	1.08	0.367	-1.45	down
pme3305	p-Coumaryl alcohol	Phenylpropanoids	141000	46500	106000	1040000	1010000	1070000	1.07	10.6	3.41	up
pme3309	2-Methylglutaric acid	Organic acids and derivatives	5510000	7570000	7330000	979000	946000	975000	1.1	0.142	-2.82	down
pme3313	D-Fructose 6-phosphate	Carbohydrates	4020000	3310000	3060000	1150000	1020000	1100000	1.1	0.315	-1.67	down
pme3336	N6-Succinyl Adenosine	Nucleotide and derivates	1260000	1390000	1470000	207000	187000	184000	1.11	0.14	-2.83	down
pme3346	5-hydroxyhexanoic acid	Organic acids and derivatives	815000	502000	648000	9	9	9	1.11	1.37e-05	-16.2	down
pme3367	6-MethylCoumarin	Phenylpropanoids	127000	177000	137000	9	9	9	1.11	6.12e-05	-14	down
pme3384	N-Acetylthreonine	Amino acid and derivatives	630000	759000	680000	281000	289000	306000	1.1	0.423	-1.24	down
pme3391	Petunidin 3-O-glucoside	Anthocyanins	1190000	1160000	1250000	9	9	9	1.11	7.5e-06	-17	down
pme3419	Esculetin (6,7-dihydroxycoumarin)	Phenylpropanoids	682000	1740000	1150000	279000	193000	243000	1.04	0.2	-2.32	down
pme3431	Esculin (6,7-Dihydroxycoumarin-6-glucoside)	Phenylpropanoids	1170000	2050000	1710000	402000	374000	388000	1.08	0.236	-2.08	down
pme3456	p-Coumaraldehyde	Phenylpropanoids	9	9	9	483000	518000	520000	1.11	56300	15.8	up
pme3459	Caffeyl alcohol	Phenylpropanoids	418000	582000	488000	89000	80900	104000	1.1	0.184	-2.44	down
pme3469	Kaempferol-3-O-robinoside-7-O-rhamnoside (Robinin)	Flavonol	1270000	1390000	1260000	137000	65700	93500	1.09	0.0756	-3.73	down
pme3478	Pantetheine	Vitamins and derivatives	1170000	612000	817000	170000	162000	165000	1.08	0.191	-2.39	down
pme3502	Formononetin 7-O-glucoside (Ononin)	Isoflavone	636000	752000	933000	290000	268000	366000	1.06	0.398	-1.33	down
pme3511	Orotidine	Others	71500	54800	43400	9	9	9	1.11	0.000159	-12.6	down
pme3544	Limonin	Terpene	173000	219000	111000	9	9	9	1.11	5.37e-05	-14.2	down
pme3576	Anthranilic acid	Organic acids and derivatives	583000	268000	408000	9	9	9	1.11	2.14e-05	-15.5	down
pme3719	D-Xylonic acid	Organic acids and derivatives	2930000	3300000	2540000	1470000	1440000	1400000	1.08	0.491	-1.02	down
pme3732	Cytidine	Nucleotide and derivates	2260000	4350000	2200000	677000	571000	663000	1.06	0.217	-2.2	down
pme3835	Guanosine 3',5'-cyclic monophosphate	Nucleotide and derivates	1260000	1260000	1020000	309000	296000	295000	1.1	0.254	-1.98	down
pme3961	Deoxyadenosine	Nucleotide and derivates	1270000	2030000	1060000	9	9	9	1.11	6.19e-06	-17.3	down
pme3970	汕-Pseudouridine	Nucleotide and derivates	90400	80000	82900	243000	199000	241000	1.1	2.7	1.43	up
pme3983	Hypoxanthine-9-汕-D-arabinofuranoside	Nucleotide and derivates	3400000	2140000	2760000	985000	990000	742000	1.06	0.327	-1.61	down
pmf0012	6,8-di-C-glucoside Apigenine	Flavone	83500	93900	64200	39600	38000	40600	1.06	0.489	-1.03	down
pmf0014	Scopolin	Phenylpropanoids	367000	521000	384000	9	9	9	1.11	2.12e-05	-15.5	down
pmf0016	DL-Methionine	Amino acid and derivatives	2570000	2790000	2620000	507000	564000	696000	1.1	0.221	-2.18	down
pmf0017	DL-Homocysteine	Amino acid and derivatives	240000	227000	136000	44500	60000	28000	1.04	0.22	-2.19	down
pmf0018	1-Aminocyclopropanecarboxylic acid	Amino acid and derivatives	3590000	3500000	4060000	1500000	1370000	1430000	1.1	0.386	-1.37	down
pmf0032	Galactinol	Carbohydrates	9440000	5910000	3490000	1670000	1430000	1350000	1.02	0.236	-2.08	down
pmf0035	Glucose-1-phosphate	Carbohydrates	11500000	9520000	9980000	3640000	3140000	3160000	1.1	0.321	-1.64	down
pmf0036	Sophocarpine	Alkaloids	82600	48500	28800	9	9	9	1.11	0.000169	-12.5	down
pmf0052	Sophoridine	Alkaloids	27400	71700	43900	9	9	9	1.11	0.000189	-12.4	down
pmf0057	4,2',4',6'-Tetrahydroxychalcone	Flavone	10900	29300	24400	9	9	9	1.11	0.000418	-11.2	down
pmf0058	4',5,7-Trihydroxyflavanone	Flavanone	10200	19000	19300	9	9	9	1.11	0.000557	-10.8	down
pmf0059	UDP-汐-D-glucose	Nucleotide and derivates	9540000	7900000	8670000	3470000	2870000	3140000	1.1	0.363	-1.46	down
pmf0067	Isoacteoside	Phenylpropanoids	25500	43200	51000	9	9	9	1.11	0.000226	-12.1	down
pmf0094	Methyl p-coumarate	Phenylpropanoids	4500000	2870000	2500000	374000	425000	435000	1.09	0.125	-3	down
pmf0095	Methyl ferulate	Phenylpropanoids	1350000	1140000	834000	58800	70900	68900	1.1	0.0597	-4.06	down
pmf0096	Oxalic acid	Organic acids and derivatives	9	9	9	778000	702000	715000	1.11	81300	16.3	up
pmf0098	trans-4-Hydroxycinnamic acid Methyl Ester	Phenylpropanoids	3170000	1950000	1820000	349000	382000	378000	1.09	0.16	-2.65	down
pmf0104	Caffeic acid	Phenylpropanoids	10100000	12500000	9150000	245000	258000	261000	1.11	0.0241	-5.38	down
pmf0118	Uridine 5'-diphosphoglucose disodium salt	Nucleotide and derivates	10100000	7320000	9360000	3640000	3530000	3180000	1.08	0.386	-1.37	down
pmf0131	Cryptochlorogenic acid	Organic acids and derivatives	13100000	16800000	12900000	1670000	1500000	1500000	1.11	0.109	-3.2	down
pmf0138	D-(+)-Mannose	Carbohydrates	3490000	3680000	1730000	434000	467000	460000	1.07	0.153	-2.71	down
pmf0139	D-(+)-Galactose	Carbohydrates	3110000	3170000	1570000	467000	449000	446000	1.07	0.174	-2.53	down
pmf0178	Ethyl caffeate	Organic acids and derivatives	251000	118000	170000	9	9	9	1.11	5.01e-05	-14.3	down
pmf0203	Peonidin 3-O-glucoside chloride	Anthocyanins	343000	645000	444000	9	9	9	1.11	1.89e-05	-15.7	down
pmf0217	D-Glucose-6-phosphate disodium salt	Others	8590000	8070000	7310000	2490000	2560000	2460000	1.11	0.313	-1.67	down
pmf0218	Phosphoenolpyruvate trisodium salt	Organic acids and derivatives	524000	448000	333000	4040	3370	5040	1.11	0.00954	-6.71	down
pmf0220	D-Fructose 6-phosphate-disodium salt	Carbohydrates	12400000	10200000	10600000	3890000	3810000	3590000	1.1	0.34	-1.56	down
pmf0231	Chlorpyrifos	Alkaloids	18500	20400	19300	4070	6270	6390	1.08	0.287	-1.8	down
pmf0234	Isoschaftoside	Flavonoid	129000	171000	140000	24500	40300	29100	1.08	0.213	-2.23	down
pmf0256	3-Methyl-1-pentanol	Alcohols	8010000	14000000	10900000	3530000	3800000	3830000	1.06	0.339	-1.56	down
pmf0271	(E)-p-coumaric acid	Phenylpropanoids	1100000	913000	1100000	407000	480000	475000	1.09	0.438	-1.19	down
pmf0274	Herbacetin	Flavonoid	18800	34400	22200	11900	11000	9630	1	0.431	-1.21	down
pmf0280	D-Galacturonic acid	Organic acids and derivatives	1760000	2350000	1090000	80700	61500	82600	1.1	0.0432	-4.53	down
pmf0282	Melibiose	Carbohydrates	2050000	1360000	709000	290000	241000	246000	1.03	0.189	-2.41	down
pmf0286	Phytol	Terpene	6860000	19400000	10300000	1060000	1070000	1080000	1.07	0.0878	-3.51	down
pmf0287	3'-dephospho-CoA	Nucleotide and derivates	239000	172000	142000	9	9	9	1.11	4.88e-05	-14.3	down
pmf0291	4-Hydroxypyridine	Alkaloids	776000	710000	503000	142000	132000	134000	1.09	0.205	-2.29	down
pmf0292	D-erythro-sphinganine	Amino acid and derivatives	310000	183000	295000	42300	30000	32000	1.09	0.132	-2.92	down
pmf0302	Engeletin	Flavonoid	123000	124000	139000	20300	40800	42600	1.04	0.269	-1.9	down
pmf0328	lumichrome	Alkaloids	229000	176000	226000	83800	67900	66500	1.09	0.346	-1.53	down
pmf0330	Spinosin	Flavonoid	54400	258000	143000	9	9	9	1.1	5.93e-05	-14	down
pmf0339	Roseoside	Terpene	4310000	4810000	5110000	1310000	1160000	1490000	1.1	0.278	-1.85	down
pmf0351	Cucumegastigmane I	Others	628000	1630000	1020000	251000	273000	253000	1.03	0.237	-2.08	down
pmf0363	Hydroxygenkwanin	Flavonoid	70900	76100	71100	9	9	9	1.11	0.000124	-13	down
pmf0370	Persicoside	Flavonoid	300000	174000	287000	9	9	9	1.11	3.55e-05	-14.8	down
pmf0381	Vicenin-3	Flavonoid	90000	146000	115000	21700	22700	36600	1.06	0.231	-2.12	down
pmf0391	Batatasin III	Others	36100	87100	67500	9	9	9	1.11	0.000142	-12.8	down
pmf0393	Persicogenin	Flavonoid	40200	88400	82100	9	9	9	1.11	0.000128	-12.9	down
pmf0399	cis-Gondoic acid	Lipids	21300	37800	30900	251000	228000	243000	1.1	8.02	3	up
pmf0408	Plantamajoside	Organic acids and derivatives	573000	1140000	854000	41100	33600	53300	1.09	0.0499	-4.33	down
pmf0416	汐-Ionone	Others	2030000	2860000	2490000	170000	172000	168000	1.11	0.0691	-3.86	down
pmf0417	Eriocitrin	Flavonoid	27800	119000	78300	9	9	9	1.1	0.00012	-13	down
pmf0419	Salicin	Organic acids and derivatives	24200	18900	24500	9	9	9	1.11	0.000399	-11.3	down
pmf0420	Benzyl acetate	Organic acids and derivatives	85700	105000	76600	1210000	1180000	1260000	1.11	13.7	3.77	up
pmf0424	Isochlorogenic acid B	Organic acids and derivatives	9	9	9	553000	550000	513000	1.11	59900	15.9	up
pmf0440	4-Methoxycinna Maldehyde	Phenylpropanoids	270000	280000	168000	9	9	9	1.11	3.76e-05	-14.7	down
pmf0443	Parthenolide	Others	287000	365000	374000	9	9	9	1.11	2.63e-05	-15.2	down
pmf0455	Peimine	Alkaloids	2540000	3070000	2720000	21800000	21100000	22400000	1.11	7.84	2.97	up
pmf0465	Geniposide	Terpene	21500	22100	32700	5360	6170	8290	1.07	0.26	-1.94	down
pmf0468	Morroniside	Terpene	1160000	1340000	1520000	174000	184000	163000	1.1	0.13	-2.95	down
pmf0469	cis-4-Hydroxy-D-proline	Amino acid and derivatives	30500	36700	24400	9	9	9	1.11	0.000295	-11.7	down
pmf0474	Geniposidic acid	Terpene	57600	78600	53300	9	9	9	1.11	0.000142	-12.8	down
pmf0477	Pachymic acid	Terpene	84200	90500	56300	33700	28900	36000	1.04	0.427	-1.23	down
pmf0482	Cynarin	Organic acids and derivatives	11800000	14900000	12700000	1550000	1430000	1420000	1.11	0.112	-3.16	down
pmf0485	Panose	Carbohydrates	323000	136000	119000	20300	19100	12600	1.06	0.09	-3.47	down
pmf0493	Puararin	Flavonoid	39800	37100	32400	84300	95800	105000	1.09	2.61	1.38	up
pmf0522	alpha-Santonin	Others	196000	262000	159000	9	9	9	1.11	4.38e-05	-14.5	down
pmf0525	Imperatorin	Phenylpropanoids	104000	86100	96300	9	9	9	1.11	9.43e-05	-13.4	down
pmf0560	Abrine	Alkaloids	273000	204000	373000	4430000	5560000	5830000	1.1	18.6	4.22	up
pmf0578	Citric acid monohydrate	Organic acids and derivatives	2770000	4850000	3590000	384000	395000	292000	1.09	0.0955	-3.39	down
pmf0585	Proline	Amino acid and derivatives	4140000	3880000	4820000	2040000	1910000	2080000	1.09	0.47	-1.09	down
pmf0587	Aspartic acid	Amino acid and derivatives	6430000	7760000	9820000	2410000	2360000	2290000	1.09	0.294	-1.77	down
pmf0590	Glutamic acid	Amino acid and derivatives	75600000	77000000	67800000	23500000	25600000	26200000	1.1	0.342	-1.55	down
pmf0602	Purpurin	Quinones	108000	109000	121000	9	9	9	1.11	7.99e-05	-13.6	down
pmf0604	汕-Caryophyllene	Terpene	8590000	8990000	6640000	2600000	2920000	3020000	1.09	0.353	-1.5	down
pmf0608	Umbelliferone	Phenylpropanoids	316000	204000	181000	520000	576000	531000	1.03	2.32	1.21	up
pmf0619	Peonidin 3-feruloylsophoroside-5-glucoside.	Anthocyanins	211000	802000	99400	9	9	9	1.1	2.43e-05	-15.3	down
