# Supplementary material for: Transcriptome and metabolome analyses provide crucial insights into the adaptation of chieh-qua to Fusarium oxysporum infection
Source: Front Plant Sci. 2024 Nov 7;15:1344155. doi: 10.3389/fpls.2024.1344155 (PMC11578706; doi:10.3389/fpls.2024.1344155)
Supplement: Supplementary Table 4 — Differential metabolites in KB_vs_GB. [file Table4.xlsx]

## Sheet: KB_vs_GB.metabolize
Index	Compounds	Class	GB1	GB2	GB3	KB1	KB2	KB3	VIP	Fold_Change	Log2FC	Type
pma0134	D(-)-Threose	Carbohydrates	19000000	19300000	20400000	978000	747000	1400000	1.13	0.0532	-4.23	down
pma0249	Selgin 5-O-hexoside	Flavone	9	9	9	535000	234000	574000	1.13	49700	15.6	up
pma0253	O-methylChrysoeriol 5-O-hexoside	Flavone	89900	46200	64800	403000	492000	472000	1.11	6.8	2.77	up
pma0461	14,15-Dehydrocrepenynic acid	Lipids	4400000	4320000	4400000	13400000	22500000	13900000	1.1	3.8	1.92	up
pma0724	Naringenin C-hexoside	Flavone	58300	62700	35400	1460000	1820000	1250000	1.13	29	4.86	up
pma0948	Hydroxyphenethylamine	Others	88300	79100	77300	338000	156000	328000	1.04	3.36	1.75	up
pma1108	Apigenin C-glucoside	Flavone	1320000	1280000	1300000	15300000	17100000	14900000	1.13	12.1	3.6	up
pma2088	Quercetin-3,4'-O-di-beta-glucopyranoside	Flavonol	9	9	9	316000	323000	340000	1.13	36300	15.1	up
pma3101	Nicotinate ribonucleoside	Vitamins and derivatives	1320000	1040000	1450000	4260000	4960000	7040000	1.1	4.27	2.09	up
pma3606	9-Hydroxy-(10E,12Z,15Z)-octadecatrienoic acid	Lipids	3500000	3590000	3620000	12800000	19900000	10600000	1.09	4.04	2.02	up
pma3649	5-Aminolevulinate	Organic acids and derivatives	12200000	11400000	12700000	30300000	24300000	19200000	1.06	2.03	1.02	up
pma3724	1-O-Feruloyl quinic acid	Organic acids and derivatives	1460000	1450000	1430000	3490000	5340000	4060000	1.11	2.97	1.57	up
pma6199	Chrysin O-hexoside	Flavone	47100	34100	52100	154000	95000	214000	1.04	3.47	1.8	up
pma6298	3-Hydroxypyridine	Others	378000	392000	438000	1550000	1600000	1740000	1.13	4.05	2.02	up
pma6360	O-methylChrysoeriol 8-C-hexoside	Flavone	9	9	9	65300	96300	125000	1.13	10600	13.4	up
pma6460	5-O-p-Coumaroylquinic acid	Organic acids and derivatives	33500	31100	31400	175000	233000	229000	1.13	6.64	2.73	up
pma6496	Luteolin 6-C-glucoside	Flavone	574000	546000	511000	3520000	2620000	3740000	1.12	6.06	2.6	up
pma6499	Limocitrin O-hexoside	Flavone	9	9	9	254000	158000	389000	1.13	29700	14.9	up
pma6516	C-hexosyl-apigenin O-hexosyl-O-hexoside	Flavone	3950000	3970000	3380000	37000000	38900000	41200000	1.13	10.4	3.37	up
pma6561	Caffeic acid O-glucoside	Phenylpropanoids	8550000	8200000	7990000	29000000	30100000	29600000	1.13	3.59	1.84	up
pma6625	E-3,4,5'-Trihydroxy-3'-glucopyranosylstilbene	Others	9	9	9	64800	73500	19000	1.13	5830	12.5	up
pmb0069	Benzamide	Others	39500	40200	49200	304000	270000	112000	1.05	5.32	2.41	up
pmb0115	3-Hydroxykynurenine	Amino acid and derivatives	418000	455000	461000	1800000	1590000	2290000	1.12	4.26	2.09	up
pmb0128	delta-Tridecalactone	Lipids	9	9	9	82800	109000	212000	1.13	15000	13.9	up
pmb0130	N-Acetyl tryptamine	Phenolamides	9	9	9	91200	42800	78100	1.13	7860	12.9	up
pmb0142	Caffeic aldehyde	Phenylpropanoids	308000	315000	348000	1660000	2490000	1700000	1.12	6.02	2.59	up
pmb0149	MAG (18:4) isomer1	Lipids	507000	469000	500000	1040000	2190000	1640000	1.06	3.3	1.72	up
pmb0160	MAG (18:3) isomer5	Lipids	4340000	4490000	4450000	9800000	9450000	8370000	1.12	2.08	1.06	up
pmb0165	LysoPC 16:1	Lipids	99900	124000	109000	2500000	1850000	3120000	1.13	22.4	4.49	up
pmb0168	PC 16:1/14:1	Lipids	38900	37700	39000	347000	651000	530000	1.12	13.2	3.72	up
pmb0235	O-Feruloyl coumarin	Phenylpropanoids	279000	244000	363000	1060000	959000	1390000	1.1	3.85	1.94	up
pmb0247	p-Aminobenzoate	Organic acids and derivatives	132000	142000	144000	276000	308000	258000	1.12	2.01	1.01	up
pmb0296	MAG (18:1) isomer2	Lipids	459000	506000	468000	1360000	1330000	1460000	1.13	2.9	1.53	up
pmb0302	2-Aminoethylphosphonate	Lipids	80600	135000	101000	456000	425000	646000	1.1	4.82	2.27	up
pmb0325	N-Feruloyl spermidine	Phenolamides	9	9	9	110000	71900	104000	1.13	10600	13.4	up
pmb0374	Aminopurine	Others	249000	251000	329000	26100000	14600000	9240000	1.12	60.2	5.91	up
pmb0464	Aspartic acid di-O-glucoside	Amino acid and derivatives	227000	216000	190000	393000	773000	801000	1.04	3.11	1.64	up
pmb0478	Coumarin O-rutinoside	Phenylpropanoids	9	9	9	50400	28000	37500	1.13	4290	12.1	up
pmb0484	Choline	Alkaloids	1610000	1500000	1550000	5370000	6710000	6540000	1.13	4	2	up
pmb0492	"N',N"",N""'-p-coumaroyl-cinnamoyl-caffeoyl spermidine"	Phenolamides	1070000	947000	1170000	3250000	1920000	2850000	1.06	2.52	1.33	up
pmb0505	N'-p-Coumaroyl putrescine	Phenolamides	9	9	9	279000	297000	271000	1.13	31400	14.9	up
pmb0514	Adenosine 3'-monophosphate	Nucleotide and derivates	3180000	3040000	2980000	40700000	30100000	33200000	1.13	11.3	3.5	up
pmb0530	Nicotinic acid adenine dinucleotide	Nucleotide and derivates	909000	841000	1020000	3760000	5440000	6040000	1.12	5.5	2.46	up
pmb0532	Inosine 5'-monophosphate	Nucleotide and derivates	211000	201000	303000	4230000	2640000	2660000	1.12	13.3	3.74	up
pmb0565	Syringetin 3-O-hexoside	Flavonol	9	9	9	217000	224000	388000	1.13	30700	14.9	up
pmb0595	Isorhamnetin 5-O-hexoside	Flavonol	9	9	9	535000	446000	815000	1.13	66500	16	up
pmb0602	Syringetin 7-O-hexoside	Flavone	9	9	9	421000	358000	596000	1.13	50900	15.6	up
pmb0605	Apigenin 7-O-glucoside (Cosmosiin)	Flavone	195000	196000	196000	1730000	1850000	1630000	1.13	8.88	3.15	up
pmb0607	Chrysoeriol 7-O-hexoside	Flavone	9	9	9	353000	553000	383000	1.13	47700	15.5	up
pmb0624	6-C-hexosyl-luteolin O-hexoside	Flavone	9	9	9	185000	122000	172000	1.13	17700	14.1	up
pmb0629	Chrysoeriol 6-C-hexoside	Flavone	9	9	9	255000	953000	365000	1.13	58300	15.8	up
pmb0644	Luteolin C-hexoside	Flavone	471000	372000	300000	2530000	1760000	2520000	1.11	5.96	2.57	up
pmb0652	C-hexosyl-apigenin O-pentoside	Flavone	3230000	2880000	2970000	16600000	16600000	18100000	1.13	5.65	2.5	up
pmb0661	Chrysoeriol C-hexosyl-O-rhamnoside	Flavone	30000	16400	29800	82500	97800	122000	1.08	3.97	1.99	up
pmb0673	Apigenin 6-C-pentoside	Flavone	9	9	9	98300	86400	58900	1.13	9020	13.1	up
pmb0681	Apigenin 8-C-pentoside	Flavone	9	9	9	79000	99700	76600	1.13	9460	13.2	up
pmb0701	Chrysoeriol 8-C-hexoside	Flavone	9	9	9	631000	478000	278000	1.13	51400	15.6	up
pmb0703	6-C-hexosyl-chrysoeriol O-feruloylhexoside	Flavone	182000	158000	177000	785000	596000	927000	1.12	4.46	2.16	up
pmb0732	Tricin 5-O-feruloylhexoside	Flavone	9	9	9	71200	105000	57400	1.13	8650	13.1	up
pmb0751	5-O-p-Coumaroyl shikimic acid	Organic acids and derivatives	167000	153000	177000	674000	703000	588000	1.13	3.95	1.98	up
pmb0764	4-Methyl-5-thiazoleethanol	Alcohols	31200	19800	34300	273000	483000	403000	1.12	13.6	3.76	up
pmb0767	D-erythro-Dihydrosphingosine	Alcohols	169000	98400	104000	1240000	1010000	812000	1.11	8.24	3.04	up
pmb0770	N-Feruloyl serotonin	Alkaloids	9	9	9	107000	168000	184000	1.13	17000	14.1	up
pmb0789	Pyridoxine O-glucoside	Vitamins and derivatives	10300000	9710000	10300000	34100000	42900000	29100000	1.12	3.5	1.81	up
pmb0800	Niacinamide	Vitamins and derivatives	8670000	7990000	7340000	17400000	19000000	22200000	1.11	2.44	1.29	up
pmb0801	4-Pyridoxic acid O-hexoside	Vitamins and derivatives	9	9	9	550000	208000	471000	1.13	45500	15.5	up
pmb0802	D-Pantothenic acid	Vitamins and derivatives	237000	258000	191000	904000	898000	1240000	1.11	4.43	2.15	up
pmb0812	Imidazole-4-acetate	Indole derivatives	9	9	9	689000	708000	1140000	1.13	94000	16.5	up
pmb0818	Methoxyindoleacetic acid	Indole derivatives	10800000	10800000	10700000	2080000	2040000	1490000	1.13	0.174	-2.53	down
pmb0819	3-Indoleacetonitrile	Indole derivatives	10300000	14200000	14000000	1110000	356000	105000	1.06	0.0408	-4.62	down
pmb0848	LysoPC 16:1 (2n isomer)	Lipids	4230000	4090000	3960000	41500000	39000000	48900000	1.13	10.5	3.4	up
pmb0852	LysoPC 18:2	Lipids	20400	19300	32200	1360000	2060000	2720000	1.13	85.4	6.42	up
pmb0854	LysoPC 18:3	Lipids	17500000	12700000	12600000	62900000	47100000	75300000	1.1	4.33	2.11	up
pmb0855	LysoPC 16:0	Lipids	1100000	813000	706000	4790000	3410000	6180000	1.1	5.49	2.46	up
pmb0856	LysoPE 18:1 (2n isomer)	Lipids	7060000	6890000	6840000	25800000	21700000	22100000	1.13	3.35	1.74	up
pmb0859	LysoPC 18:1 (2n isomer)	Lipids	144000	124000	134000	2570000	2720000	2610000	1.13	19.7	4.3	up
pmb0863	LysoPC 16:2 (2n isomer)	Lipids	1140000	1120000	1100000	16000000	15800000	20100000	1.13	15.4	3.95	up
pmb0864	LysoPE 14:0	Lipids	107000	100000	107000	497000	452000	492000	1.13	4.59	2.2	up
pmb0865	LysoPC 18:3 (2n isomer)	Lipids	814000	755000	730000	8060000	8040000	8990000	1.13	10.9	3.45	up
pmb0866	LysoPC 14:0	Lipids	255000	233000	212000	1370000	1530000	1300000	1.13	6	2.58	up
pmb0873	LysoPC 18:2 (2n isomer)	Lipids	74000	70000	57100	1360000	1340000	1520000	1.13	21	4.39	up
pmb0874	LysoPE 18:2 (2n isomer)	Lipids	215000	210000	225000	6410000	7130000	8870000	1.13	34.5	5.11	up
pmb0876	LysoPE 16:0	Lipids	198000	119000	103000	1240000	826000	1200000	1.11	7.78	2.96	up
pmb0877	LysoPE 18:1	Lipids	290000	253000	299000	1010000	863000	794000	1.12	3.17	1.66	up
pmb0880	LysoPE 18:0 (2n isomer)	Lipids	9	9	9	32000	20100	47000	1.13	3670	11.8	up
pmb0882	LysoPC 18:1	Lipids	251000	174000	199000	9230000	12000000	21500000	1.12	68.5	6.1	up
pmb0883	LysoPE 18:0	Lipids	97200	44100	47600	976000	584000	687000	1.11	11.9	3.57	up
pmb0885	4-oxo-9Z,11Z,13E,15E-octadecatetraenoic acid	Lipids	377000	374000	399000	1250000	1290000	1010000	1.12	3.09	1.63	up
pmb0889	Punicic acid	Lipids	5600000	5480000	5430000	24900000	45800000	21100000	1.09	5.56	2.48	up
pmb0964	iP7G	Nucleotide and derivates	692000	660000	742000	1700000	2040000	2270000	1.12	2.87	1.52	up
pmb0998	Guanosine 5'-monophosphate	Nucleotide and derivates	205000	166000	267000	1500000	960000	1500000	1.11	6.21	2.63	up
pmb1096	Indole	Indole derivatives	37400000	34600000	34600000	7470000	6760000	5110000	1.12	0.181	-2.46	down
pmb1318	8-Methyl-2-oxo-4-phenyl-2H-chromen-7-yl 4-(hexyloxy)benzoate	Organic acids and derivatives	5890000	5720000	5760000	15900000	14600000	14100000	1.13	2.57	1.36	up
pmb1530	Phytocassane D	Terpene	145000	159000	159000	629000	681000	587000	1.13	4.1	2.03	up
pmb1562	MAG (18:4) isomer3	Lipids	594000	813000	724000	273000	284000	249000	1.11	0.378	-1.4	down
pmb1574	Octadecadien-6-ynoic acid	Lipids	582000	566000	537000	4130000	4810000	3940000	1.13	7.64	2.93	up
pmb1587	4-Hydroxy-3,5-diisopropylbenzaldehyde	Organic acids and derivatives	9	9	9	158000	156000	124000	1.13	16200	14	up
pmb1650	Octadeca-11E,13E,15Z-trienoic acid	Lipids	15900000	19100000	18800000	52900000	52200000	55800000	1.13	2.99	1.58	up
pmb1652	Phthalic anhydride	Others	3630000	3460000	3750000	9700000	9540000	10500000	1.13	2.74	1.46	up
pmb1656	MAG (18:3) isomer4	Lipids	4450000	4640000	4410000	2650000	1850000	2100000	1.09	0.489	-1.03	down
pmb1754	O-Phosphocholine	Alkaloids	2900000	3340000	3110000	13500000	14900000	11600000	1.13	4.28	2.1	up
pmb1912	10-Formyl-THF	Organic acids and derivatives	9250000	8280000	8820000	22100000	21900000	30200000	1.11	2.82	1.49	up
pmb2211	Cocamidopropyl betaine	Alkaloids	1610000	1430000	1490000	3810000	3050000	6870000	1.03	3.03	1.6	up
pmb2251	DGMG (18:1)	Lipids	36400000	35900000	39100000	88600000	72800000	77800000	1.12	2.15	1.1	up
pmb2319	LysoPC 15:0	Lipids	1100000	1040000	1040000	2580000	1920000	2980000	1.08	2.35	1.23	up
pmb2325	MAG (18:3) isomer2	Lipids	8640000	8360000	8990000	18800000	17500000	16500000	1.13	2.03	1.02	up
pmb2363	MAG (18:1) isomer1	Lipids	610000	617000	592000	1840000	1280000	1060000	1.05	2.3	1.2	up
pmb2388	LysoPC 18:0 (2n isomer)	Lipids	384000	357000	352000	6390000	6360000	7760000	1.13	18.8	4.23	up
pmb2406	LysoPC 17:0	Lipids	715000	442000	447000	1930000	1120000	2100000	1.04	3.21	1.68	up
pmb2444	MAG (18:3) isomer1	Lipids	267000	296000	319000	1400000	1420000	1660000	1.13	5.08	2.34	up
pmb2467	α-Linolenic acid	Lipids	173000	169000	162000	812000	857000	853000	1.13	5	2.32	up
pmb2620	3,4-Dimethoxycinnamic acid	Phenylpropanoids	9	9	9	64700	87400	108000	1.13	9630	13.2	up
pmb2640	Lauric acid (C12:0)	Lipids	5180	5250	5170	14800	11600	10700	1.11	2.38	1.25	up
pmb2653	D(+)-Melezitose O-rhamnoside	Carbohydrates	6770	9640	14600	74500	31600	68300	1.05	5.62	2.49	up
pmb2654	Anthranilate O-hexosyl-O-hexoside	Organic acids and derivatives	7800	9150	4600	83900	90900	147000	1.11	14.9	3.9	up
pmb2657	Argininosuccinate	Organic acids and derivatives	86400	84100	83800	306000	434000	493000	1.12	4.85	2.28	up
pmb2684	Cyclic AMP	Nucleotide and derivates	255000	211000	249000	1820000	1510000	1970000	1.13	7.41	2.89	up
pmb2778	9,10-EODE	Lipids	1190000	1180000	1180000	5390000	9360000	4190000	1.09	5.34	2.42	up
pmb2786	9-HOTrE	Lipids	974000	949000	965000	5410000	7180000	4850000	1.13	6.04	2.59	up
pmb2787	9-KODE	Lipids	120000	116000	110000	1640000	1360000	875000	1.12	11.2	3.49	up
pmb2789	13-HpOTrE(r)	Lipids	511000	545000	507000	2980000	2780000	2390000	1.13	5.21	2.38	up
pmb2791	9-HpOTrE	Lipids	483000	479000	464000	2700000	2560000	1850000	1.12	4.99	2.32	up
pmb2795	4-Methoxycinnamic acid	Phenylpropanoids	215000	211000	220000	2270000	2960000	2400000	1.13	11.8	3.56	up
pmb2799	12,13-EODE	Lipids	25200	25600	27600	177000	175000	104000	1.11	5.82	2.54	up
pmb2804	13-HPODE	Lipids	39800	40000	37700	167000	205000	102000	1.09	4.03	2.01	up
pmb2826	Citramalate	Organic acids and derivatives	9	9	9	500000	615000	763000	1.13	69600	16.1	up
pmb2850	Tricin	Flavone	28200	25700	24600	9	9	9	1.13	0.000344	-11.5	down
pmb2867	Kynurenic acid O-hexside	Organic acids and derivatives	52200	46400	46800	328000	356000	356000	1.13	7.15	2.84	up
pmb2893	N-p-Coumaroyl hydroxyagmatine	Phenolamides	9	9	9	30900	30900	17700	1.13	2940	11.5	up
pmb2928	Gallic acid O-Hexoside	Organic acids and derivatives	2290000	1990000	2140000	9810000	9880000	9560000	1.13	4.56	2.19	up
pmb2933	Caftaric acid	Phenylpropanoids	9	9	9	54600	63900	38100	1.13	5800	12.5	up
pmb2979	Hesperetin O-malonylhexoside	Flavanone	208000	171000	140000	1280000	870000	1260000	1.12	6.57	2.72	up
pmb2984	Acetyl-eriodictyol O-hexoside	Flavone	9	9	9	17800	25100	31100	1.13	2740	11.4	up
pmb3000	Chrysoeriol O-acetylhexoside	Flavone	91500	75100	91700	43000	18000	23900	1.03	0.329	-1.61	down
pmb3023	Eriodictyol C-hexoside	Flavone	440000	458000	502000	32800000	41600000	23200000	1.13	69.7	6.12	up
pmb3046	Tricin 7-O-hexoside	Flavone	337000	355000	367000	9	9	9	1.13	2.55e-05	-15.3	down
pmb3056	Homovanilloyl quinic acid	Organic acids and derivatives	9	9	9	180000	329000	389000	1.13	33300	15	up
pmb3058	Quinic acid O-glucuronic acid	Organic acids and derivatives	9	9	9	57000	120000	143000	1.13	11900	13.5	up
pmb3068	1-O-p-Coumaroyl quinic acid	Organic acids and derivatives	9	9	9	23700	15500	27900	1.13	2490	11.3	up
pmb3074	3-O-p-Coumaroyl quinic acid	Organic acids and derivatives	5490000	5320000	5370000	24100000	35700000	26400000	1.12	5.33	2.41	up
pmb3075	3-O-p-Coumaroyl shikimic acid	Organic acids and derivatives	27600	30200	29900	152000	153000	126000	1.13	4.91	2.3	up
pmb3088	Trehalose 6-phosphate	Carbohydrates	10100	8760	8940	20900	25600	21500	1.12	2.45	1.29	up
pmb3099	Diethyl phosphate	Organic acids and derivatives	9	9	9	617000	753000	482000	1.13	68600	16.1	up
pmb3101	2-Isopropylmalate	Organic acids and derivatives	272000	244000	237000	2400000	2620000	3970000	1.12	11.9	3.58	up
pmb3110	Vanillic acid	Phenylpropanoids	18200	20200	24800	136000	138000	66500	1.08	5.39	2.43	up
pmb3317	Quinacyl syringic acid	Organic acids and derivatives	9	9	9	82500	79200	106000	1.13	9910	13.3	up
pmb3894	Di-O-methylquercetin	Flavonol	267000	253000	277000	1200000	1150000	832000	1.12	3.99	2	up
pmc0281	Adenosine O-ribose	Nucleotide and derivates	18300000	16200000	16600000	7460000	4750000	5200000	1.1	0.341	-1.55	down
pmc0304	Succinyladenosine	Nucleotide and derivates	2830000	2710000	2820000	5340000	5600000	10600000	1.01	2.58	1.37	up
pmc0682	4-Aminoindole	Indole derivatives	364000	351000	323000	1700000	1210000	2000000	1.11	4.73	2.24	up
pmc0960	LysoPC 20:4	Lipids	3580000	3250000	3190000	47500000	47500000	51900000	1.13	14.7	3.87	up
pmc1990	4'-Hydroxy-5,7-dimethoxyflavanone	Flavanone	489000	533000	522000	38800	51700	34400	1.13	0.0809	-3.63	down
pmd0023	Adenosine	Nucleotide and derivates	135000	125000	129000	980000	548000	348000	1.05	4.82	2.27	up
pmd0130	LysoPC 14:0 (2n isomer)	Lipids	410000	385000	368000	2250000	2010000	2180000	1.13	5.54	2.47	up
pmd0132	LysoPC 16:0 (2n isomer)	Lipids	1140000	844000	831000	5050000	3590000	6260000	1.11	5.29	2.4	up
pmd0136	LysoPC 18:0	Lipids	8390000	4990000	4900000	40700000	27000000	45300000	1.1	6.18	2.63	up
pmd0144	LysoPC 20:1 (2n isomer)	Lipids	41500	22300	39200	505000	439000	611000	1.12	15.1	3.92	up
pmd0145	LysoPC 20:1	Lipids	38200	38600	36100	592000	452000	641000	1.13	14.9	3.9	up
pmd0158	LysoPE 14:0 (2n isomer)	Lipids	2760	3490	1850	9030	8100	9090	1.08	3.24	1.69	up
pmd0160	LysoPE 16:0 (2n isomer)	Lipids	4830000	3080000	3070000	25100000	16800000	20500000	1.11	5.68	2.51	up
pme0004	L-Homocitrulline	Amino acid and derivatives	362000	342000	338000	1150000	1730000	1190000	1.11	3.91	1.97	up
pme0006	L-Proline	Amino acid and derivatives	2090000	1990000	2130000	4120000	6400000	3770000	1.05	2.3	1.2	up
pme0008	L-Citrulline	Amino acid and derivatives	111000000	120000000	123000000	1960000	3320000	2300000	1.13	0.0214	-5.55	down
pme0014	L-Glutamic acid	Amino acid and derivatives	22700000	24600000	24100000	36900000	54600000	60800000	1.05	2.13	1.09	up
pme0015	L-(-)-Cystine	Amino acid and derivatives	525000	538000	567000	9	9	9	1.13	1.66e-05	-15.9	down
pme0026	L-(+)-Lysine	Amino acid and derivatives	43600000	48200000	50900000	8720000	8720000	4790000	1.11	0.156	-2.68	down
pme0037	L-Histidine	Amino acid and derivatives	638000	666000	660000	4060000	3560000	6490000	1.11	7.18	2.84	up
pme0038	Cytosine	Nucleotide and derivates	328000	352000	376000	1730000	1180000	1280000	1.12	3.97	1.99	up
pme0043	L-(+)-Arginine	Amino acid and derivatives	31400000	32700000	35600000	4260000	6660000	5020000	1.12	0.16	-2.64	down
pme0050	L-Tryptophan	Amino acid and derivatives	64100000	63800000	64400000	10800000	9950000	7290000	1.13	0.146	-2.78	down
pme0056	2,3-dimethylsuccinic acid	Amino acid and derivatives	928000	906000	892000	5850000	7620000	4660000	1.12	6.65	2.73	up
pme0085	Rosmarinic acid	Organic acids and derivatives	99400	75200	77400	206000	319000	277000	1.1	3.18	1.67	up
pme0108	5-Methylcytosine	Nucleotide and derivates	61900	47400	86300	453000	528000	417000	1.12	7.15	2.84	up
pme0109	(-)-3-(3,4-Dihydroxyphenyl)-2-methylalanine	Amino acid and derivatives	542000	465000	489000	187000	247000	223000	1.11	0.439	-1.19	down
pme0113	γ-Glu-Cys	Amino acid and derivatives	30500	23200	44100	332000	925000	906000	1.1	22.1	4.47	up
pme0118	Pyrrole-2-carboxylic acid	Amino acid and derivatives	9	9	9	150000	137000	124000	1.13	15200	13.9	up
pme0120	5-Aminovaleric acid	Amino acid and derivatives	56300	38700	39100	302000	317000	321000	1.13	7.01	2.81	up
pme0122	N6-Acetyl-L-lysine	Amino acid and derivatives	3110000	3280000	3340000	7190000	11900000	7710000	1.08	2.75	1.46	up
pme0133	Asp-phe	Amino acid and derivatives	215000	161000	191000	440000	532000	483000	1.11	2.57	1.36	up
pme0138	Nα-Acetyl-L-glutamine	Amino acid and derivatives	4670000	5110000	4960000	9760000	15400000	11900000	1.09	2.51	1.33	up
pme0163	β-Nicotinamide mononucleotide	Nucleotide and derivates	620000	481000	701000	1650000	1480000	2630000	1.06	3.2	1.68	up
pme0170	Nα-Acetyl-L-arginine	Amino acid and derivatives	224000	214000	215000	392000	465000	676000	1.06	2.35	1.23	up
pme0183	2-Hydroxy-6-aminopurine	Nucleotide and derivates	168000	154000	234000	1630000	1390000	1050000	1.12	7.32	2.87	up
pme0193	L-Glutamine	Amino acid and derivatives	47100000	50500000	49300000	8140000	8890000	5180000	1.12	0.151	-2.73	down
pme0207	3-Hydroxybutyrate	Organic acids and derivatives	607000	533000	607000	1350000	1370000	2420000	1.06	2.94	1.56	up
pme0225	L-Asparagine	Amino acid and derivatives	2080000	2330000	2380000	407000	731000	324000	1.08	0.215	-2.22	down
pme0234	Kynurenic acid	Organic acids and derivatives	2270000	2400000	2320000	20300000	22900000	34300000	1.12	11.1	3.47	up
pme0237	Ethyl 3,4-Dihydroxybenzoate (Ethyl protocatechuate)	Organic acids and derivatives	9	9	9	162000	231000	198000	1.13	21900	14.4	up
pme0238	2–furanoic acid	Organic acids and derivatives	649000	738000	565000	2980000	2740000	3560000	1.12	4.75	2.25	up
pme0245	Adipic acid	Organic acids and derivatives	1080000	1030000	1070000	6950000	9010000	5600000	1.12	6.78	2.76	up
pme0247	trans-4-Hydroxy-L-proline	Amino acid and derivatives	4510	6350	5310	28500	57200	38300	1.11	7.67	2.94	up
pme0253	N-Acetyl-l-leucine	Amino acid and derivatives	40800	36000	40300	135000	160000	145000	1.13	3.76	1.91	up
pme0257	Uracil	Nucleotide and derivates	338000	365000	425000	696000	820000	812000	1.1	2.06	1.05	up
pme0267	2-Methylsuccinic acid	Organic acids and derivatives	399000	439000	485000	2100000	2920000	1650000	1.11	5.04	2.33	up
pme0278	2,6-Diaminooimelic acid	Amino acid and derivatives	398000	416000	362000	80700	126000	101000	1.11	0.262	-1.93	down
pme0281	Terephthalic acid	Organic acids and derivatives	9	9	9	2090000	2640000	2340000	1.13	262000	18	up
pme0282	Phthalic acid	Organic acids and derivatives	32200	36300	54500	183000	196000	210000	1.11	4.79	2.26	up
pme0285	4-Guanidinobutyric acid	Organic acids and derivatives	1570000	1510000	1560000	5490000	5780000	4540000	1.13	3.41	1.77	up
pme0291	Dl-2-Aminooctanoic acid	Organic acids and derivatives	9	9	9	53200	56100	82900	1.13	7120	12.8	up
pme0300	trans-Cinnamate	Phenylpropanoids	397000	430000	445000	9	9	9	1.13	2.12e-05	-15.5	down
pme0303	Caffeate	Phenylpropanoids	193000	188000	180000	8380000	9460000	8080000	1.13	46.2	5.53	up
pme0305	Ferulic acid	Phenylpropanoids	1280000	1270000	1280000	6660000	6340000	3830000	1.1	4.39	2.14	up
pme0309	Methyl gallate	Organic acids and derivatives	9	9	9	14400	15700	172000	1.11	7490	12.9	up
pme0359	Apigenin 5-O-glucoside	Flavone	75700	83600	152000	2910000	3480000	2920000	1.12	29.9	4.9	up
pme0376	Naringenin	Flavanone	9	9	9	36000	55800	27400	1.13	4410	12.1	up
pme0391	4-Methylumbelliferone	Phenylpropanoids	9	9	9	183000	223000	257000	1.13	24600	14.6	up
pme0399	Chlorogenic acid (3-O-Caffeoylquinic acid)	Organic acids and derivatives	1150000	1000000	906000	7200000	13800000	11900000	1.12	10.8	3.43	up
pme0418	3-(4-Hydroxyphenyl)propionic acid	Phenylpropanoids	28500	24900	16200	142000	124000	60300	1.05	4.69	2.23	up
pme0422	3-Hydroxy-4-methoxycinnamic acid	Phenylpropanoids	1260000	1220000	1290000	7170000	6620000	3780000	1.1	4.66	2.22	up
pme0486	Methylmalonic acid	Organic acids and derivatives	1370000	1380000	1370000	15300000	17500000	19700000	1.13	12.7	3.67	up
pme0491	6-hydroxynicotinic acid	Vitamins and derivatives	9	9	9	242000	334000	203000	1.13	28900	14.8	up
pme0500	D(+)-Melezitose	Carbohydrates	10600	9460	8390	70400	72100	64800	1.13	7.29	2.87	up
pme0513	Xylitol	Alcohols	9	9	9	118000	159000	199000	1.13	17600	14.1	up
pme0516	Inositol	Alcohols	595000	621000	589000	1390000	2480000	1310000	1.05	2.87	1.52	up
pme0519	D-(+)-Sucrose	Carbohydrates	591000	622000	586000	3100000	3800000	4620000	1.12	6.4	2.68	up
pme0534	Gluconic acid	Others	877000	840000	810000	2380000	3390000	3410000	1.11	3.63	1.86	up
pme1018	Glutathione oxidized	Amino acid and derivatives	679000	611000	740000	1550000	2810000	3900000	1.05	4.07	2.02	up
pme1021	D-(+)-Glucono-1,5-lactone	Carbohydrates	23000	24500	39300	174000	106000	109000	1.08	4.48	2.16	up
pme1090	Glutathione reduced form	Amino acid and derivatives	274000	286000	299000	1960000	8630000	6180000	1.08	19.5	4.29	up
pme1107	Guanine	Nucleotide and derivates	18600	18300	17700	251000	157000	52700	1.03	8.44	3.08	up
pme1261	Pantothenol	Alcohols	87700	90600	79700	41800	26600	40500	1.07	0.422	-1.24	down
pme1266	3-Methylxanthine	Nucleotide and derivates	9	9	9	128000	85700	69100	1.13	10500	13.4	up
pme1281	Pyridoxal 5'-phosphate	Vitamins and derivatives	9	9	9	169000	296000	588000	1.13	39000	15.3	up
pme1283	S-(5'-Adenosy)-L-homocysteine	Amino acid and derivatives	70500	77500	68500	492000	526000	366000	1.13	6.39	2.68	up
pme1292	Homogentisic acid	Organic acids and derivatives	1690000	1680000	1770000	365000	699000	881000	1.01	0.378	-1.4	down
pme1294	Xanthosine	Nucleotide and derivates	660000	607000	610000	1300000	1830000	1420000	1.1	2.42	1.28	up
pme1313	N'-Formylkynurenine	Amino acid and derivatives	670000	596000	684000	204000	206000	255000	1.12	0.341	-1.55	down
pme1383	Pyridoxine	Vitamins and derivatives	163000	198000	152000	1020000	1360000	817000	1.12	6.23	2.64	up
pme1419	L-Methionine methyl ester	Amino acid and derivatives	73300	79100	79700	526000	689000	747000	1.13	8.45	3.08	up
pme1434	Syringin	Phenylpropanoids	9	9	9	97500	120000	149000	1.13	13600	13.7	up
pme1436	p-Coumaric acid	Phenylpropanoids	4930000	4820000	4680000	30200000	28300000	11600000	1.05	4.86	2.28	up
pme1473	5'-Deoxy-5'-(methylthio)adenosine	Nucleotide and derivates	9	9	9	153000	173000	71700	1.13	14700	13.8	up
pme1514	Epigallocatechin (EGC)	Polyphenol	9	9	9	45700	50700	50600	1.13	5440	12.4	up
pme1535	(+)-Gallocatechin (GC)	Polyphenol	9	9	9	43700	59400	36300	1.13	5160	12.3	up
pme1611	Isohemiphloin	Flavone	159000	169000	150000	1870000	2260000	1550000	1.13	11.9	3.57	up
pme1624	Isovitexin	Flavone	1080000	1050000	1150000	13600000	16400000	14600000	1.13	13.6	3.77	up
pme1637	Coniferyl alcohol	Phenylpropanoids	122000	117000	129000	339000	400000	377000	1.13	3.03	1.6	up
pme1665	Isovitexin 7-O-glucoside (Saponarin)	Flavonoid	339000	372000	462000	2080000	2110000	2240000	1.13	5.48	2.45	up
pme1683	D-Pantothenic dcid	Organic acids and derivatives	309000	270000	304000	4160000	4580000	6420000	1.13	17.2	4.1	up
pme1691	Acetylcholine	Alkaloids	145000	143000	125000	242000	332000	489000	1.03	2.57	1.36	up
pme1695	Sinapic acid	Phenylpropanoids	39500	48900	25900	249000	167000	141000	1.08	4.87	2.28	up
pme1709	Nicotinic Acid Methyl Ester (Methyl Nicotinate)	Vitamins and derivatives	677000	770000	775000	5990000	5690000	9880000	1.12	9.7	3.28	up
pme1806	Chlorogenic acid methyl ester	Organic acids and derivatives	962000	910000	965000	3100000	4600000	3680000	1.12	4.01	2	up
pme1814	2,5-dihydroxybenzoic acid (Gentisic acid)	Organic acids and derivatives	9	9	9	544000	553000	683000	1.13	65900	16	up
pme1816	Neochlorogenic acid (5-O-Caffeoylquinic acid)	Organic acids and derivatives	451000	377000	355000	2630000	2180000	5070000	1.1	8.35	3.06	up
pme1824	Protocatechuic acid	Polyphenol	238000	282000	232000	1140000	1320000	1340000	1.13	5.05	2.34	up
pme1832	Succinic acid	Organic acids and derivatives	9	9	9	1500000	1820000	1820000	1.13	190000	17.5	up
pme1846	D(+)-Glucose	Carbohydrates	428000	342000	349000	1570000	1980000	1500000	1.12	4.51	2.17	up
pme2019	DL-Arabinose	Carbohydrates	108000	148000	156000	620000	786000	595000	1.11	4.86	2.28	up
pme2033	L(-)-Malic acid	Organic acids and derivatives	941000	882000	764000	9300000	10200000	7470000	1.13	10.4	3.38	up
pme2036	Quinic acid	Organic acids and derivatives	6300000	5880000	4990000	12800000	22800000	39400000	1.02	4.37	2.13	up
pme2050	Citric acid	Organic acids and derivatives	260000	177000	94700	5940000	9950000	16600000	1.11	61.1	5.93	up
pme2122	Histamine	Amino acid and derivatives	306000	300000	336000	1360000	974000	1020000	1.12	3.56	1.83	up
pme2169	Fumaric acid	Organic acids and derivatives	3100000	2770000	2990000	19700000	20300000	15500000	1.13	6.26	2.65	up
pme2237	Dulcitol	Alcohols	9370	17700	16000	119000	181000	161000	1.11	10.7	3.42	up
pme2241	Citraconic acid	Organic acids and derivatives	9	9	9	1380000	1870000	2210000	1.13	202000	17.6	up
pme2256	D-Arabitol	Alcohols	6080	9340	5890	167000	221000	250000	1.13	29.9	4.9	up
pme2263	Biotin	Vitamins and derivatives	9	9	9	8270	16700	10400	1.13	1310	10.4	up
pme2268	Trigonelline	Alkaloids	2770000	2630000	3160000	17600000	31300000	29500000	1.12	9.16	3.2	up
pme2278	Guanosine monophosphate	Nucleotide and derivates	55500	60600	34500	177000	99900	179000	1.03	3.03	1.6	up
pme2292	Putrescine	Phenolamides	1200000	1200000	1220000	110000	30800	162000	1.06	0.0836	-3.58	down
pme2366	Phenethylamine	Others	174000	218000	203000	1250000	1250000	545000	1.07	5.12	2.36	up
pme2380	A-Ketoglutaric acid	Organic acids and derivatives	236000	216000	208000	1040000	1210000	1860000	1.11	6.23	2.64	up
pme2427	N-Acetyl-L-tyrosine	Amino acid and derivatives	43700	39800	37000	129000	103000	152000	1.11	3.19	1.67	up
pme2435	L-Fucose	Carbohydrates	9	9	9	293000	279000	317000	1.13	32900	15	up
pme2478	Protocatechuic aldehyde	Polyphenol	215000	198000	214000	1660000	2180000	1220000	1.12	8.07	3.01	up
pme2527	L(+)-Ornithine	Amino acid and derivatives	644000	676000	790000	75700	146000	54500	1.09	0.131	-2.93	down
pme2529	1,5-Anhydro-D-glucitol	Alcohols	9	9	9	325000	308000	445000	1.13	39900	15.3	up
pme2555	Adenosine 5'-monophosphate	Nucleotide and derivates	143000	120000	83700	2200000	1770000	1880000	1.13	16.9	4.08	up
pme2560	N-Acetylaspartate	Amino acid and derivatives	140000	127000	73800	377000	487000	493000	1.09	3.98	1.99	up
pme2596	4-Pyridoxic acid	Alkaloids	673000	636000	499000	2790000	2120000	3950000	1.1	4.9	2.29	up
pme2598	3,4-Dihydroxybenzeneacetic acid	Organic acids and derivatives	9	9	9	400000	557000	308000	1.13	46900	15.5	up
pme2601	3-Hydroxypropanoic acid	Organic acids and derivatives	131000	112000	124000	509000	530000	445000	1.13	4.04	2.02	up
pme2670	4-Hydroxybenzaldehyde	Organic acids and derivatives	2210000	2340000	2360000	20100000	13600000	7180000	1.07	5.92	2.56	up
pme2706	2,3-Dihydroxybenzoic acid	Organic acids and derivatives	206000	199000	201000	1180000	1330000	1400000	1.13	6.45	2.69	up
pme2735	S-(5'-Adenosyl)-L-methionine	Amino acid and derivatives	3860000	3340000	2770000	22700000	20200000	19300000	1.13	6.24	2.64	up
pme2746	Flavin adenine dinucleotide (FAD)	Nucleotide and derivates	303000	324000	316000	2360000	2890000	4630000	1.12	10.5	3.39	up
pme2761	4-Hydroxy-2-oxoglutaric acid	Organic acids and derivatives	9	9	9	242000	284000	219000	1.13	27600	14.8	up
pme2827	Palmitaldehyde	Lipids	24700000	26100000	25500000	1920000	2170000	1520000	1.13	0.0735	-3.77	down
pme2901	1-O-Caffeoyl quinic acid	Organic acids and derivatives	459000	410000	367000	2620000	2160000	5000000	1.1	7.91	2.98	up
pme2903	4-Hydroxybenzoic acid	Organic acids and derivatives	1850000	1830000	1990000	8290000	5670000	7200000	1.12	3.73	1.9	up
pme2914	3-Hydroxy-3-methylpentane-1,5-dioic acid	Amino acid and derivatives	1730000	1550000	1550000	4660000	2680000	3290000	1.04	2.2	1.14	up
pme2957	Naringenin chalcone	Flavanone	9	9	9	34900	59700	44600	1.13	5160	12.3	up
pme2973	Icariin (kaempferol 3,7-O-diglucoside 8-prenyl derivative)	Flavonol	9	9	9	106000	75500	44600	1.13	8370	13	up
pme2988	3,4-Dihydrocoumarin	Phenylpropanoids	89400	78400	85600	408000	274000	285000	1.11	3.82	1.93	up
pme3007	Uridine 5’-diphosphate	Nucleotide and derivates	8500	18600	16200	31500	45800	57600	1	3.12	1.64	up
pme3011	γ-aminobutyric acid	Organic acids and derivatives	1430000	1430000	1670000	6260000	5090000	6720000	1.12	3.99	2	up
pme3017	2-Aminoisobutyric acid	Amino acid and derivatives	1200000	1250000	1320000	3990000	4170000	3820000	1.13	3.18	1.67	up
pme3033	N,N-Dimethylglycine	Amino acid and derivatives	1370000	1380000	1550000	5660000	4980000	5790000	1.13	3.82	1.93	up
pme3083	2-(Formylamino)benzoic acid	Organic acids and derivatives	571000	536000	588000	3560000	3330000	1500000	1.07	4.95	2.31	up
pme3096	Aminomalonic acid	Organic acids and derivatives	627000	684000	675000	3420000	4170000	5130000	1.12	6.4	2.68	up
pme3104	1-Methyladenine	Nucleotide and derivates	96900	128000	143000	509000	373000	286000	1.07	3.17	1.67	up
pme3123	Sinapyl alcohol	Phenylpropanoids	9	9	9	70000	86200	65000	1.13	8190	13	up
pme3134	3-Hydroxyflavone	Flavonol	9	9	9	12700	12400	8920	1.13	1260	10.3	up
pme3143	6-Hydroxy-4-methylcoumarin	Phenylpropanoids	9	9	9	138000	123000	119000	1.13	14100	13.8	up
pme3160	D-Glucose 6-phosphate	Carbohydrates	3690000	3520000	3350000	7110000	9840000	9950000	1.1	2.55	1.35	up
pme3174	Cytidine 5'-monophosphate (Cytidylic acid)	Nucleotide and derivates	89100	111000	165000	543000	401000	491000	1.09	3.93	1.97	up
pme3179	CYS-GLY	Amino acid and derivatives	12200	16300	24200	105000	499000	407000	1.06	19.2	4.26	up
pme3184	2'-Deoxyadenosine-5'-monophosphate	Nucleotide and derivates	665000	648000	833000	3050000	3740000	2450000	1.11	4.31	2.11	up
pme3194	N-acetylglycine	Amino acid and derivatives	1170000	1190000	1370000	256000	293000	328000	1.13	0.235	-2.09	down
pme3198	2,4-Dihydroxybenzoic acid	Organic acids and derivatives	9	9	9	515000	304000	357000	1.13	43600	15.4	up
pme3210	Genistein 7-O-Glucoside (Genistin)	Isoflavone	156000	97200	77400	2580000	3320000	2540000	1.13	25.5	4.67	up
pme3227	Vitexin 2''-O-beta-L-rhamnoside	Flavone	1220000	1040000	1050000	4840000	4990000	5760000	1.13	4.71	2.24	up
pme3246	Coniferin	Phenylpropanoids	8090000	7730000	7850000	27700000	28700000	27300000	1.13	3.54	1.82	up
pme3303	Tricetin	Flavone	68800	48900	67200	159000	143000	216000	1.08	2.8	1.49	up
pme3309	2-Methylglutaric acid	Organic acids and derivatives	979000	946000	975000	6110000	8070000	4920000	1.12	6.59	2.72	up
pme3313	D-Fructose 6-phosphate	Carbohydrates	1150000	1020000	1100000	2420000	3130000	3670000	1.1	2.82	1.5	up
pme3336	N6-Succinyl Adenosine	Nucleotide and derivates	207000	187000	184000	491000	452000	922000	1.05	3.23	1.69	up
pme3346	5-hydroxyhexanoic acid	Organic acids and derivatives	9	9	9	328000	369000	506000	1.13	44600	15.4	up
pme3367	6-MethylCoumarin	Phenylpropanoids	9	9	9	212000	133000	140000	1.13	18000	14.1	up
pme3384	N-Acetylthreonine	Amino acid and derivatives	281000	289000	306000	577000	701000	596000	1.12	2.14	1.1	up
pme3388	H-HomoArg-OH	Amino acid and derivatives	685000	611000	670000	100000	135000	151000	1.12	0.196	-2.35	down
pme3391	Petunidin 3-O-glucoside	Anthocyanins	9	9	9	997000	559000	1380000	1.13	109000	16.7	up
pme3419	Esculetin (6,7-dihydroxycoumarin)	Phenylpropanoids	279000	193000	243000	1270000	714000	916000	1.09	4.06	2.02	up
pme3431	Esculin (6,7-Dihydroxycoumarin-6-glucoside)	Phenylpropanoids	402000	374000	388000	2190000	1150000	2870000	1.07	5.34	2.42	up
pme3456	p-Coumaraldehyde	Phenylpropanoids	483000	518000	520000	140000	130000	137000	1.13	0.268	-1.9	down
pme3459	Caffeyl alcohol	Phenylpropanoids	89000	80900	104000	386000	414000	396000	1.13	4.37	2.13	up
pme3469	Kaempferol-3-O-robinoside-7-O-rhamnoside (Robinin)	Flavonol	137000	65700	93500	2070000	2620000	1710000	1.12	21.6	4.43	up
pme3473	Butin	Flavone	8140	10600	10600	38400	67500	38100	1.1	4.91	2.3	up
pme3478	Pantetheine	Vitamins and derivatives	170000	162000	165000	526000	932000	898000	1.1	4.74	2.25	up
pme3511	Orotidine	Others	9	9	9	55600	47900	23500	1.13	4700	12.2	up
pme3544	Limonin	Terpene	9	9	9	43200	186000	67000	1.13	11000	13.4	up
pme3564	Daphnetin	Phenylpropanoids	403000	543000	469000	1070000	747000	1180000	1.03	2.12	1.08	up
pme3576	Anthranilic acid	Organic acids and derivatives	9	9	9	161000	265000	338000	1.13	28300	14.8	up
pme3732	Cytidine	Nucleotide and derivates	677000	571000	663000	3000000	1780000	1700000	1.08	3.39	1.76	up
pme3835	Guanosine 3',5'-cyclic monophosphate	Nucleotide and derivates	309000	296000	295000	1190000	928000	1360000	1.12	3.86	1.95	up
pme3961	Deoxyadenosine	Nucleotide and derivates	9	9	9	2330000	1830000	916000	1.13	188000	17.5	up
pme3970	β-Pseudouridine	Nucleotide and derivates	243000	199000	241000	74400	87400	64300	1.11	0.331	-1.59	down
pmf0005	Narirutin	Flavone	9	9	9	25600	33300	15300	1.13	2750	11.4	up
pmf0012	6,8-di-C-glucoside Apigenine	Flavone	39600	38000	40600	117000	114000	99300	1.13	2.79	1.48	up
pmf0014	Scopolin	Phenylpropanoids	9	9	9	445000	541000	413000	1.13	51800	15.7	up
pmf0016	DL-Methionine	Amino acid and derivatives	507000	564000	696000	2290000	2240000	2000000	1.12	3.7	1.89	up
pmf0017	DL-Homocysteine	Amino acid and derivatives	44500	60000	28000	196000	117000	271000	1.03	4.41	2.14	up
pmf0032	Galactinol	Carbohydrates	1670000	1430000	1350000	6930000	8040000	9750000	1.12	5.56	2.47	up
pmf0035	Glucose-1-phosphate	Carbohydrates	3640000	3140000	3160000	7840000	8760000	10200000	1.12	2.7	1.43	up
pmf0036	Sophocarpine	Alkaloids	9	9	9	24800	43500	47100	1.13	4270	12.1	up
pmf0052	Sophoridine	Alkaloids	9	9	9	57000	38400	53800	1.13	5530	12.4	up
pmf0057	4,2',4',6'-Tetrahydroxychalcone	Flavone	9	9	9	43800	57900	22800	1.13	4610	12.2	up
pmf0058	4',5,7-Trihydroxyflavanone	Flavanone	9	9	9	29200	48900	18500	1.13	3580	11.8	up
pmf0067	Isoacteoside	Phenylpropanoids	9	9	9	97400	69800	24000	1.13	7080	12.8	up
pmf0094	Methyl p-coumarate	Phenylpropanoids	374000	425000	435000	5670000	7490000	6450000	1.13	15.9	3.99	up
pmf0095	Methyl ferulate	Phenylpropanoids	58800	70900	68900	948000	1220000	1430000	1.13	18.1	4.18	up
pmf0096	Oxalic acid	Organic acids and derivatives	778000	702000	715000	9	9	9	1.13	1.23e-05	-16.3	down
pmf0098	trans-4-Hydroxycinnamic acid Methyl Ester	Phenylpropanoids	349000	382000	378000	3790000	5150000	4080000	1.13	11.7	3.55	up
pmf0104	Caffeic acid	Phenylpropanoids	245000	258000	261000	7710000	10800000	7850000	1.13	34.5	5.11	up
pmf0131	Cryptochlorogenic acid	Organic acids and derivatives	1670000	1500000	1500000	12200000	15800000	18500000	1.13	9.96	3.32	up
pmf0138	D-(+)-Mannose	Carbohydrates	434000	467000	460000	3620000	4220000	3050000	1.13	8	3	up
pmf0139	D-(+)-Galactose	Carbohydrates	467000	449000	446000	3080000	3960000	2810000	1.13	7.23	2.85	up
pmf0178	Ethyl caffeate	Organic acids and derivatives	9	9	9	127000	162000	215000	1.13	18700	14.2	up
pmf0203	Peonidin 3-O-glucoside chloride	Anthocyanins	9	9	9	360000	427000	331000	1.13	41400	15.3	up
pmf0209	Capsaicin	Alkaloids	9	9	9	7770	14500	6660	1.13	1070	10.1	up
pmf0217	D-Glucose-6-phosphate disodium salt	Others	2490000	2560000	2460000	5320000	6380000	7330000	1.11	2.53	1.34	up
pmf0218	Phosphoenolpyruvate trisodium salt	Organic acids and derivatives	4040	3370	5040	104000	196000	402000	1.11	56.4	5.82	up
pmf0220	D-Fructose 6-phosphate-disodium salt	Carbohydrates	3890000	3810000	3590000	7320000	9310000	10600000	1.1	2.41	1.27	up
pmf0231	Chlorpyrifos	Alkaloids	4070	6270	6390	32100	24700	21600	1.1	4.69	2.23	up
pmf0234	Isoschaftoside	Flavonoid	24500	40300	29100	166000	140000	168000	1.11	5.05	2.34	up
pmf0247	Orientin	Flavonoid	549000	476000	559000	3370000	2530000	3400000	1.13	5.87	2.55	up
pmf0256	3-Methyl-1-pentanol	Alcohols	3530000	3800000	3830000	21700000	11300000	22300000	1.09	4.96	2.31	up
pmf0267	Indole-3-carboxylic	Alkaloids	184000	184000	197000	61900	91500	46000	1.06	0.353	-1.5	down
pmf0271	(E)-p-coumaric acid	Phenylpropanoids	407000	480000	475000	2030000	2260000	829000	1.01	3.76	1.91	up
pmf0280	D-Galacturonic acid	Organic acids and derivatives	80700	61500	82600	1160000	1930000	3210000	1.11	28	4.81	up
pmf0282	Melibiose	Carbohydrates	290000	241000	246000	1300000	1650000	2020000	1.12	6.4	2.68	up
pmf0286	Phytol	Terpene	1060000	1070000	1080000	4920000	9950000	4080000	1.08	5.9	2.56	up
pmf0287	3'-dephospho-CoA	Nucleotide and derivates	9	9	9	133000	149000	173000	1.13	16900	14	up
pmf0292	D-erythro-sphinganine	Amino acid and derivatives	42300	30000	32000	327000	256000	212000	1.12	7.62	2.93	up
pmf0302	Engeletin	Flavonoid	20300	40800	42600	135000	134000	146000	1.07	4	2	up
pmf0328	lumichrome	Alkaloids	83800	67900	66500	114000	140000	183000	1.03	2	1	up
pmf0330	Spinosin	Flavonoid	9	9	9	246000	215000	104000	1.13	20900	14.4	up
pmf0336	Indole-3-carboxylic acid	Alkaloids	185000	189000	169000	70400	103000	49800	1.03	0.411	-1.28	down
pmf0339	Roseoside	Terpene	1310000	1160000	1490000	4890000	3790000	5730000	1.11	3.64	1.86	up
pmf0351	Cucumegastigmane I	Others	251000	273000	253000	1150000	980000	1630000	1.11	4.84	2.27	up
pmf0363	Hydroxygenkwanin	Flavonoid	9	9	9	23500	33500	52100	1.13	4040	12	up
pmf0370	Persicoside	Flavonoid	9	9	9	263000	323000	273000	1.13	31800	15	up
pmf0377	O-Nornuciferine	Alkaloids	52700	68100	67600	204000	132000	201000	1.08	2.85	1.51	up
pmf0381	Vicenin-3	Flavonoid	21700	22700	36600	129000	110000	125000	1.1	4.49	2.17	up
pmf0391	Batatasin III	Others	9	9	9	163000	80500	51900	1.13	10900	13.4	up
pmf0393	Persicogenin	Flavonoid	9	9	9	57300	52600	60600	1.13	6310	12.6	up
pmf0399	cis-Gondoic acid	Lipids	251000	228000	243000	63200	56200	46500	1.12	0.23	-2.12	down
pmf0408	Plantamajoside	Organic acids and derivatives	41100	33600	53300	1450000	1150000	575000	1.11	24.8	4.63	up
pmf0416	α-Ionone	Others	170000	172000	168000	1220000	1950000	1240000	1.12	8.65	3.11	up
pmf0417	Eriocitrin	Flavonoid	9	9	9	41300	174000	77800	1.13	10900	13.4	up
pmf0419	Salicin	Organic acids and derivatives	9	9	9	22400	21800	20600	1.13	2400	11.2	up
pmf0420	Benzyl acetate	Organic acids and derivatives	1210000	1180000	1260000	62800	87200	78100	1.13	0.0625	-4	down
pmf0436	1-Deoxynojirimycin	Alkaloids	9	9	9	17200	23500	19500	1.13	2230	11.1	up
pmf0440	4-Methoxycinna Maldehyde	Phenylpropanoids	9	9	9	241000	358000	209000	1.13	29900	14.9	up
pmf0441	N-Acetyl-L-phenylalanine	Amino acid and derivatives	315000	335000	322000	124000	81800	80100	1.11	0.294	-1.77	down
pmf0443	Parthenolide	Others	9	9	9	198000	216000	141000	1.13	20600	14.3	up
pmf0455	Peimine	Alkaloids	21800000	21100000	22400000	2650000	2810000	2560000	1.13	0.123	-3.03	down
pmf0465	Geniposide	Terpene	5360	6170	8290	17100	20700	18200	1.09	2.83	1.5	up
pmf0468	Morroniside	Terpene	174000	184000	163000	1330000	1330000	1320000	1.13	7.64	2.93	up
pmf0469	cis-4-Hydroxy-D-proline	Amino acid and derivatives	9	9	9	22000	55900	31200	1.13	4040	12	up
pmf0474	Geniposidic acid	Terpene	9	9	9	67200	67600	71600	1.13	7640	12.9	up
pmf0482	Cynarin	Organic acids and derivatives	1550000	1430000	1420000	9130000	9540000	12300000	1.13	7.04	2.82	up
pmf0485	Panose	Carbohydrates	20300	19100	12600	168000	176000	198000	1.12	10.4	3.38	up
pmf0525	Imperatorin	Phenylpropanoids	9	9	9	84200	114000	154000	1.13	13000	13.7	up
pmf0560	Abrine	Alkaloids	4430000	5560000	5830000	517000	314000	207000	1.11	0.0656	-3.93	down
pmf0578	Citric acid monohydrate	Organic acids and derivatives	384000	395000	292000	1930000	3640000	6940000	1.08	11.7	3.55	up
pmf0585	Proline	Amino acid and derivatives	2040000	1910000	2080000	3980000	6170000	3790000	1.06	2.31	1.21	up
pmf0590	Glutamic acid	Amino acid and derivatives	23500000	25600000	26200000	42700000	58900000	67000000	1.07	2.24	1.16	up
pmf0602	Purpurin	Quinones	9	9	9	67100	101000	80800	1.13	9220	13.2	up
pmf0604	β-Caryophyllene	Terpene	2600000	2920000	3020000	8270000	9200000	9030000	1.13	3.1	1.63	up
pmf0606	Pectin (Technical Grade)	Others	76500	76300	80500	302000	209000	320000	1.11	3.56	1.83	up
pmf0619	Peonidin 3-feruloylsophoroside-5-glucoside.	Anthocyanins	9	9	9	386000	766000	504000	1.13	61300	15.9	up
